# Supplementary material for: The enteric nervous system of the C. elegans pharynx is specified by the Sine oculis-like homeobox gene ceh-34
Source: eLife. 2022 Mar 24;11:e76003. doi: 10.7554/eLife.76003 (PMC8989417; doi:10.7554/eLife.76003)
Supplement: Source data 1. [file elife-76003-data1.xlsx]

## Sheet: Fig.2
Fig. 2C
ceh-34 Fosmid; pha-4 Prom
wt	pha-4(q490)
29	6
27	3
23	1
21	4
20	2
29	4
28	4
24	5

## Sheet: Fig.3
Fig.3B
eat-4Prom	ON	OFF
wt I2	20	0
ceh-34(tm3733) I2	0	18
eat-4Prom	ON	OFF
wt M3	39	1
ceh-34(tm3733) M3	0	40
wt MI	20	0
ceh-34(tm3733) MI	0	20
wt I5	20	0
ceh-34(tm3733) I5	0	20
unc-17Prom	ON	OFF
wt I1	40	0
ceh-34(tm3733) I1	0	40
wt M1	20	0
ceh-34(tm3733) M1	2	20
wt M2	40	0
ceh-34(tm3733) M2	2	38
wt M4	20	0
ceh-34(tm3733) M4	0	20
wt MC	40	0
ceh-34(tm3733) MC	0	40
tph-1Fosmid	ON	OFF
wt NSM	30	0
ceh-34(tm3733) NSM	0	30
cat-1Prom	ON	OFF
wt NSM	18	0
ceh-34(tm3733) NSM	0	20
cat-4Prom	ON	OFF
wt NSM	20	0
ceh-34(tm3733) NSM	0	24
bas-1Prom	ON	DIM	OFF
wt NSM	20	0	0
ceh-34(tm3733) NSM	0	4	24

## Sheet: Fig.4
Fig.4A
glr-2Prom	ON	DIM	OFF
wt M1	21	0	0
ceh-34(tm3733) M1	0	12	13
mgl-1Prom	ON	OFF
wt NSM	30	0
ceh-34(ot1014) NSM	0	30
ser-7CRISPR	ON	OFF or DIM
wt I2	20	0
ceh-34(ot1014) I2	0	20
wt I4	10	0
ceh-34(ot1014) I4	0	10
wt I5	10	0
ceh-34(ot1014) I5	0	10
wt I6	10	0
ceh-34(ot1014) I6	0	10
wt M2	20	0
ceh-34(ot1014) M2	0	20
wt M3	20	0
ceh-34(ot1014) M3	0	20
wt M4	10	0
ceh-34(ot1014) M4	0	10
wt M5	10	0
ceh-34(ot1014) M5	0	10
wt MC	20	0
ceh-34(ot1014) MC	0	20
wt MI	10	0
ceh-34(ot1014) MI	0	20
Fig. 4B
trhr-1CRISPR	wt	ceh-34(ot1014)
	6	1
	6	2
	6	0
	6	0
	6	0
	8	0
	6	1
	6	0
	6	1
	6	1
	8	0
		1
		0
		2
		0
		0
		2

## Sheet: Fig.5
Fig.5A
flp-2Prom	ON	DIM	OFF
wt MC	24	0	0
ceh-34(tm3733) MC	0	0	24
wt M4	12	0	0
ceh-34(tm3733) M4	0	0	12
wt I5	12	0	0
ceh-34(tm3733) I5	0	2	10
flp-4Prom	ON	DIM	OFF
wt M4	10	0	0
ceh-34(tm3733) M4	0	0	20
wt NSM	20	0	0
ceh-34(tm3733) NSM	0	0	40
wt I5	10	0	0
ceh-34(tm3733) I5	0	10	11
wt I6	10	0	0
ceh-34(tm3733) I6	0	11	10
flp-5CRISPR	wt	ceh-34(ot1014)
	9	2
	8	2
	9	3
	9	3
	8	2
	7	2
	10	2
	9	3
	8	1
	8	2
	8	2
	8	6
	8	3
	8	0
	7	0
	8	2
	8	3
	8	2
	9	2
	8	3
flp-21Prom	ON	DIM	OFF
wt M4	19	0	0
ceh-34(ot1014) M4	6	1	18
wt M2	38	0	0
ceh-34(ot1014) M2	14	38	2
flp-28CRISPR	ON	OFF
wt M1	16	0
ceh-34(ot1014) M1	0	13
wt M5	10	6
ceh-34(ot1014) M5	0	13
nlp-3Prom	wt	ceh-34(tm3733)
	12	7
	12	4
	12	3
	11	2
	12	6
	12	4
	10	2
	12	3
	12	1
	12	4
	12	3
	12	3
	11	4
	12	2
	12	3
nlp-8Prom	ON	OFF
wt I2	20	0
ceh-34(tm3733) I2	0	26
nlp-13Prom	ON	OFF
wt	28	0
ceh-34(tm3733)	4	24
trh-1CRISPR	ON	OFF
wt MI	15	0
ceh-34(ot1014) MI	0	15
wt M4	15	0
ceh-34(ot1014) M4	0	15
wt M5	15	0
ceh-34(ot1014) M5	0	15

## Sheet: Fig.6
Fig.6A
glr-7Prom	ON	OFF
wt I2	20	0
ceh-34(ot1014) I2	0	20
wt I3	10	0
ceh-34(ot1014) I3	0	10
wt I6	10	0
ceh-34(ot1014) I6	0	10
wt M2	20	0
ceh-34(ot1014) M2	0	20
wt M3	10	0
ceh-34(ot1014) M3	0	10
wt NSM	20	0
ceh-34(ot1014) NSM	0	20
gur-3Prom	ON	OFF
wt I2	20	0
ceh-34(tm3733) I2	0	20
wt I4	30	0
ceh-34(tm3733) I4	0	15
str-97Prom	ON	OFF
wt M4	20	0
ceh-34(tm3733) M4	0	20
Fig.6B
flr-2 CRISPR	ON	DIM	OFF
wt I4	14	0	0
ceh-34 I4	0	0	15
wt I5	14	0	0
ceh-34 I5	0	0	15
wt M1	14	0	0
ceh-34 M1	2	0	13
wt M4	14	0	0
ceh-34 M4	0	4	11
wt M5	14	0	0
ceh-34 M5	0	0	15
spp-12Prom	ON	DIM	OFF
wt M4	14	0	0
ceh-34(ot1014) M4	0	3	14
wt I4	13	0	1
ceh-34(ot1014) I4	0	11	6
htrl-1 CRISPR	wt	ceh-34(ot1189)
	72	69
	72	54
	71	65
	74	68
	71	64
	75	53
	73	55
	69	61
	75	51
	71	69
Fig.6C
kin-36 CRISPR	wt	ceh-34(ot1014)
	77	69
	75	71
	75	60
	75	57
	72	58
	71	62
	75	58
	70	66
	72	54
	70	58
		54

## Sheet: Fig.7
Fig.7C
eat-4CRISPR - Larval Depletion
MI Control	MI Depleted		M3 Control	M3 Depleted		I5 Control	I5 Depleted
22429.7	5154.73		36065.3	16296.8		15683.9	13727.2
29388.4	6420.53		27494.3	16093.3		26839.6	14493
39529.5	7460.91		53336.9	17480.9		26674	5683.32
31894.3	7679.05		35480.2	10033.9		36689.9	7980.07
32749.2	4390.69		51849.8	17754.1		24517.1	7480.17
34927.7	5164.16		49886.1	13360		27830.7	9409.56
29215.5	4762.05		50624	12405.7		37458.3	12644.3
30248	5970.26		49291.7	12373.8		35436.5	10212.8
39364.9	6374.05		50692.6	17574.9		35695.6	7939.05
21901.2	5017.36		38347.9	9965.98		23839.6	12162.2
35409.8	7501.41		48986.4	15259		32700.7	6430.39
32093.5	6044.9		48181.3	12030.2		25571.6	3147.32
33609.5	4096.43		52332.4	15044.1		30987	11322.8
31745.1	3193.88		46472.6	11309.6		28600	13755.5
32290.2	5638.14		49476.3	20948.9		28208.6	6693.58
			49000.6	9852.67
			41936.9	7552.89
			36347.8	11425.8
			44774.5	16859.1
			44785.3	12427.3
			42919.2	13222.5
			36511.1	16958.8
			50136.9	17093.6
			44872.1	12055.6
			47005.1	15746.1
			38743.6	10075.9
			48340.7	5391.9
			48753.6	9280.85
				14087.2
				8408.67
eat-4CRISPR - Adult Depletion
MI Control	MI Depleted		M3 Control	M3 Depleted		I5 Control	I5 Depleted
20040.7	30548.5		28085.2	30761.3		20811.1	3339.99
34587.8	19219.9		16914.6	10583.3		23672.9	2045.81
36885.6	16629.5		48830.6	16924.7		39810.7	10346.6
31542.7	18292.2		38316.2	7209.1		13657.1	12766.6
29915.2	9608.09		46774.7	39325.8		19050.2	10078.1
41007.1	20160.2		38118.1	21765.9		29222.7	14782.5
19467.1	12704.5		43275.1	27532.8		16278.2	15444
35271.1	15427.5		42945.8	10587.9		51006.1	12898.8
36961.1	24090.7		36687.9	34726		33265.9	6764.12
31187.2	14294.2		26313	17721.3		25650.2	9113.43
26434.9	26959		43002.9	31582		30288.4	10980.1
35917.2	16172.2		41809.2	13701.3		34188	7390.4
45591.9	18202.3		48536.7	26322.7		31281.7	15011.5
43404.6	24714.1		38772.8	13896.5			17012.5
	20549.1		46881.5	34509.8
			44062.3	8217.26
			52440	26082.8
			37153.3	12957.1
			60714	19278.6
			54087.2	9509.91
			64587.6	32590.8
			53641.1	20908.9
			59711	34074.4
			40441	14218
			62728.5	19844.1
			57233.5	13919
			63297.3	19575.3
			62353	11511.7
				29727
				17219.1
unc-17 CRISPR - Larval depletion
	ON	DIM	OFF
Control I3	15	0	0
Depleted I3	0	6	12
unc-17 CRISPR - Adult depletion
control I3	Depleted I3
9448.49	6871.37
12234.3	7034.17
9818.64	7761.56
9465.29	7277.9
6736.86	3909.84
14823.8	4095.24
14580.7	3994.57
12133.5	2802.7
8856.02	3228.3
12081.2	4065.46
9230.87	4031.14
10925.1	3296.05
4698.8	3166.76
8716.11	6392.83
	3697.1
ser-7 CRISPR - Larval depletion
	ON	OFF
Control I3	9	1
Depleted I3	1	22
Control I4	10	0
Depleted I4	2	21
Control M2	20	0
Depleted M2	0	46
Control MC	20	0
Depleted MC	0	46
ser-7 CRISPR - Adult depletion
	ON	DIM	OFF
Control I3	13	1	1
Depleted I3	1	6	10
Control I4	15	0	0
Depleted I4	0	6	11
Control M2	30	0	0
Depleted M2	0	2	32
Control MC	30	0	0
Depleted MC	0	19	15
spp-12Prom - Larval depletion
	ON	DIM	OFF
Control M4	13	7	0
Depleted M4	0	4	19
Control I4	20	0	0
Depleted I4	3	4	16
spp-12Prom - Adult depletion
	ON	DIM	OFF
Control M4	22	6	2
Auxin M4	0	8	21
Control I4	29	1	0
Auxin I4	7	15	7
Fig.7D
Pharyngeal pumping - Larval Depletion
ceh-34::AID only		ceh-34::AID; TIR1
Ethanol	5-Ph-IAA	Ethanol	3-Ph-IAA
177	174	168	144
177	180	180	126
174	195	186	141
192	195	174	117
207	186	153	126
165	168	156	111
171	183	180	129
183	159	180	123
174	153	45	81
159	162	189	105
171	159	96	141
165	162	165	162
201	168	162	90
162	165	195	84
144	153	129	108
162	168	174	117
144	177	186	123
162	213	174	120
180	183	171	111
150	180	153	108
162	177	174	108
216	219	165	102
213	198	177	117
222	171	204	135
198	195	195	117
177	183	192	87
234	189	207	99
195	177	204	108
207	150	204	105
201	171	222	159
192	204	204	105
204	186	192	174
195	189	210	111
204	174	177	141
183	168	186	120
180	222	186	135
201	168	177	138
195		168	75
183		201	117
192		183	108
216		198	120
		156	132
			111
			102
			117
			114
			108
			135
			105
Pharyngeal pumping - Adult depletion
ceh-34::AID only		ceh-34::AID; TIR1
Ethanol	5-Ph-IAA	Ethanol	5-Ph-IAA
141	192	105	141
144	186	147	129
156	138	159	150
141	132	162	114
123	141	168	126
174	156	162	90
123	207	183	93
192	192	195	159
186	189	162	117
189	186	171	114
177	174	189	138
219	192	177	129
192	150	144	114
171	180	174	57
150	189	141	99
165	141	183	99
147	162	165	90
168	156	165	93
165	138	153	102
180	192	129	57
126	135	168	108
180	156	171	117
192	150	180	111
162	129	168	111
183	168	165	108
183	147	159	102
135	210	150	108
201	204	183	117
159	189	180	120
171	204	183	93
144	171	186	84
156	192	186	99
165	162	171	102
	186	165	111
	168	177
	195	180

## Sheet: Fig.8
Fig.8A
ceh-34Prom	Normal	Defective
wt	20	0
ceh-34(tm3733)	0	20
Fig.8B - Data in a separate sheet
Fig.8C
tph-1Prom	Normal	Defective
wt VENTRAL (NSM)	58	2
ceh-34(n4796) VENTRAL (NSM)	47	15
wt DORSAL (NSM)	54	6
ceh-34(n4796) DORSAL (NSM)	34	28
wt THIN (NSM)	57	3
ceh-34(n4796) THIN (NSM)	50	12
tph-1Prom	Normal	Defective
wt NSM	22	8
n4796 NSM	6	25
unc-4Prom	Normal	Defective
wt NSM	15	0
ceh-34(n4796) NSM	8	7
Fig.8D
slt-1Prom	ON	OFF or DIM
wt I2	24	0
ceh-34(ot1014) I2	0	32
wt I6	12	0
ceh-34(ot1014) I6	0	16
wt M1	12	0
ceh-34(ot1014) M1	0	16
wt M2	24	0
ceh-34(ot1014) M2	0	32
wt M4	12	0
ceh-34(ot1014) M4	0	16
wt M5	12	0
ceh-34(ot1014) M5	0	16
wt MI	12	0
ceh-34(ot1014) MI	0	16
Fig.8E
rig-3 CRISPR	wt	ceh-34(ot1014)
	20	6
	20	2
	18	8
	18	4
	18	7
	20	4
	18	7
	18	7
	18	5
	20	4
	19	7
	18	5
	18	6
		6
		5
		3
		6
		5
		8
		8
rig-6 CRISPR	wt	ceh-34(ot1014)
	17	10
	17	6
	17	7
	17	6
	17	7
	17	6
	17	5
	17	5
	17	8
	17	3
		5
		5
		6
		7
		4
		4
		5
		4
		4
		5

## Sheet: Fig.8B
Fig.8B
wt - fluorescence intensity
worm1	worm2	worm3	worm4	worm5	worm6	worm7	worm8	worm9	worm10	worm11	worm12	worm13	worm14	worm15	worm16	worm17	worm18	worm19	worm20	worm21	worm22	worm23
149.178	171.544	212.671	124.955	99.7143	150.998	340.696	291.261	136.433	191.6	124.955	127.767	159.708	137.643	112.371	196.232	98.6284	103.67	129.955	119.687	90.0783	120.302	145.779
145.297	174.257	232.225	143.69	111.388	157.735	291.218	269.303	136.185	227.617	143.69	142.938	149.625	161.289	120.203	199.018	105.024	119.99	127.319	132.543	97.6708	132.568	149.201
147.683	176.667	202.209	171.807	121.159	216.459	289.026	288.786	150.498	236.672	171.807	165.805	163.397	145.826	118.906	200.584	119.641	132.794	125.589	133.938	101.954	132.307	215.802
167.662	188.85	228.065	190.542	138.322	224.909	318.993	307.341	187	245.489	190.542	189.763	185.78	181.507	133.646	258.432	137.738	146.157	166.635	168.284	107.201	159.908	213.536
206.599	207.458	267.865	180.237	166.28	238.333	306.951	313.807	194.552	295.081	180.237	236.209	219.854	214.495	162.572	283.096	166.891	155.005	183.983	185.347	124.385	166.537	220.533
204.863	220.193	264.387	190.048	173.847	268.09	319.045	333.81	225.125	316.553	190.048	220.469	261.878	255.299	171.111	324.979	177.996	168.717	191.04	220.923	125.016	198.292	218.664
222.716	229.668	303.221	201.394	209.99	235.838	337.451	351.709	295.315	315.547	201.394	245.041	284.822	250.39	176.719	322.947	197.524	159.915	241.065	270.061	134.104	237.191	232.911
246.22	254.256	325.306	218.492	228.962	256.82	325.986	327.667	283.188	366.264	218.492	256.252	308.457	241.137	211.177	320.748	189.111	159.955	307.966	314.513	155.922	236.333	246.38
270.714	259.436	330.815	229.685	211.346	248.63	318.582	339.906	327.219	360.108	229.685	240.895	304.603	254.227	229.62	301.582	207.472	187.992	297.671	306.507	173.948	216.401	269.263
284.214	246.69	347.518	226.684	211.314	274.673	353.669	335.144	305.755	402.586	226.684	253.65	316.74	293.807	235.21	308.717	231.927	184.523	376.949	324.305	174.176	220.226	281.426
293.649	256.955	339.09	251.922	255.655	399.968	368.148	353.766	360.755	444.939	251.922	315.554	383.53	316.593	260.236	312.316	212.256	188.394	331.755	366.543	181.206	235.112	256.458
343.729	279.448	344.25	274.38	289.133	742.879	504.944	585.838	508.301	689.692	274.38	306.454	442.981	318.041	288.913	302.638	212.115	254.823	308.567	389.975	218.214	246.349	287.127
629.135	392.249	385.245	550.884	405.007	698.697	569.472	587.891	811.018	731.261	550.884	286.389	549.299	389.924	360.482	401.51	271.789	305.562	470.342	433.177	281.043	313.197	376.289
687.96	415.339	724.052	703.415	473.373	411.253	647.589	606.713	751.232	466.453	703.415	255.692	666.676	509.343	537.622	637.803	381.13	340.16	680.388	638.408	312.398	513.436	485.784
476.402	346.901	817.027	527.616	367.148	308.436	368.958	364.45	449.802	343.598	527.616	263.9	371.663	595.255	461.399	573.985	433.733	313.252	504.781	484.786	252.609	488.203	610.638
337.451	314.306	377.907	337.014	261.334	298.525	325.336	308.073	337.023	328.889	337.014	274.536	264.086	297.495	257.914	351.826	276.987	244.115	343.612	332.894	175.803	293	311.138
291.797	262.688	342.286	271.12	245.14	299.989	316.493	297.693	314.61	317.622	271.12	240.946	261.229	252.88	234.736	279.119	258.118	244.29	280.724	319.02	183.822	246.923	300.661
271.543	244.157	325.962	256.305	263.625	289.599	304.439	292.758	294.469	324.778	256.305	245.316	260.22	248.603	223.614	284.548	242.785	217.734	262.523	305.882	191.164	252.645	298.862
266.066	243.758	318.982	248.153	252.864	291.205	289.324	305.625	292.81	361.328	248.153	244.669	268.507	233.245	229.456	284.349	228.089	227.758	371.502	296.493	188.298	263.684	283.732
271.134	247.363	313.261	244.364	246.332	303.975	282.479	290.075	271.846	274.989	244.364	236.989	253.884	220.373	240.175	280.528	220.405	229.613	288.232	310.602	193.354	241.873	270.299
267.546	242.214	308.056	246.929	237.786	312.308	300.584	298.759	258.521	271.867	246.929	237.797	258.005	225.157	237.37	262.227	225.22	230.042	242.019	301.957	200.925	256.612	251.714
276.838	251.042	306.52	242.851	239.587	292.941	312.575	298.019	258.133	272.428	242.851	240.722	261.987	221.145	244.142	245.397	230.884	229.091	232.846	294.071	195.117	243.453	249.018
282.802	254.212	312.23	259.361	246.801	288.87	295.629	300.69	276.993	259.62	259.361	241.415	275.699	212.936	236.926	243.877	227.859	245.662	227.88	287.221	205.071	232.529	221.969
295.434	239.476	309.041	261.373	293.677	282.434	298.528	295.048	258.312	251.169	261.373	260.676	331.656	211.014	235.566	253.95	237.111	233.111	221.576	282.171	214.774	225.794	234.437
298.413	232.534	310.752	259.556	260.021	281.094	283.471	297.709	249.445	239.414	259.556	251.643	282.321	205.649	230.975	259.672	273.159	250.311	225.327	307.085	203.198	226.787	231.328
301.213	222.893	301.103	262.469	244.021	289.817	272.068	298.402	255.807	240.442	262.469	259.335	300.996	208.33	242.063	241.989	271.322	250.335	219.968	294.286	216.958	229.555	229.026
296.855	227.848	306.638	305.856	245.171	278.294	287.7	287.743	266.05	248.253	305.856	247.176	297.702	212.255	235.73	231.177	251.232	239.508	218.451	313.446	215.657	232.136	224.969
307.182	231.787	296.59	308.245	247.002	270.507	277.927	286.89	234.449	238.789	308.245	237.446	293.687	234.576	251.61	222.169	256.259	256.671	225.319	281.829	213.673	239.643	225.649
318.266	245.941	315.626	343.72	238.796	266.231	282.716	298.713	235.451	233.822	343.72	239.216	290.06	228.105	237.266	223.407	254.103	250.253	212.05	289.074	210.302	239.024	227.759
288.411	232.377	298.617	289.968	228.553	272.36	267.575	310.893	226.825	232.894	289.968	245.889	287.152	219.659	235.637	213.818	250.454	243.583	214.004	301.458	210.633	254.283	228.208
303.713	222.414	318.55	273.443	223	276.475	269.8	294.546	246.432	237.417	273.443	239.193	265.032	213.552	238.299	214.74	281.743	254.227	208.483	297.777	200.785	248.345	222.529
310.242	204.678	320.097	265.823	220.585	270.623	260.12	277.418	224.737	224.561	265.823	235.018	275.974	213.877	234.661	209.863	313.578	257.758	213.612	288.533	197.769	269.346	217.362
330.604	202.444	340.477	262.909	221.279	256.703	269.218	278.193	229.422	225.55	262.909	232.911	265.714	198.47	227.851	213.77	240.496	269.519	221.992	275.106	192.559	255.465	216.948
324.259	204.156	345.259	268.866	236.913	263.644	251.04	284.501	229.545	239.528	268.866	222.367	282.953	191.342	228.492	205.649	250.056	269.337	216.964	278.52	190.843	270.857	217.065
303.556	204.373	302.594	282.795	240.993	262.123	261.658	273.021	244.24	239.528	282.795	223.975	284.918	191.679	217.48	210.496	268.142	243.553	206.403	292.799	212.59	241.873	207.37
300.541	198.623	298.14	279.51	232.687	284.082	272.324	275.609	245.489	239.267	279.51	228.86	274.23	212.299	205.488	228.828	269.58	267.507	205.774	310.543	217.639	247.263	212.888
296.028	188.466	298.462	288.111	234.341	281.402	279.594	279.452	231.224	228.5	288.111	223.483	274.747	219.088	204.737	240.861	244.068	268.177	204.973	297.869	190.141	256.702	218.208
301.916	198.409	292.448	276.422	229.299	268.619	270.223	281.82	243.38	235.197	276.422	224.956	274.345	216.816	205.542	226.277	247.394	248.277	224.675	287.68	180.743	251.899	215.823
311.63	191.72	275.705	287.741	230.64	277.58	271.911	271.12	238.022	249.039	287.741	219.8	290.245	211.718	201.172	227.214	249.943	273.467	237.171	290.989	181.926	251.702	206.399
324.505	190.28	279.291	284.087	215.403	271.756	273.437	271.712	242.326	254.744	284.087	216.753	283.85	209.189	200.465	228.305	244.218	281.545	226.998	283.233	182.583	254.377	216.487
318.378	185.395	276.304	302.785	207.767	277.669	287.673	268.295	236.508	246.508	302.785	214.654	276.764	196.591	189.804	217.487	233.746	272.269	228.648	311.07	205.33	260.386	241.69
309.074	181.313	279.016	310.248	217.487	288.808	276.721	273.168	241.169	245.864	310.248	230.219	276.729	193.618	190.441	209.561	233.439	261.908	239.637	302.878	195.544	266.809	244.734
302.384	173.555	273.653	311.458	260.483	284.381	270.347	282.385	235.466	243.728	311.458	209.431	283.625	193.052	188.824	224.626	236.428	252.744	239.481	289.444	191.297	262.581	243.781
310.55	174.561	277.203	317.536	361.339	270.116	281.657	274.59	254.794	237.856	317.536	203.452	290.743	199.147	191.71	241.513	226.22	237.881	231.796	291.67	176.519	260.322	238.581
323.248	175.464	278.639	329.665	429.085	318.459	382.549	289.292	342.464	307.911	329.665	229.686	285.763	286.485	202.499	228.19	232.961	243.212	234.359	266.608	198.724	270.274	202.362
308.741	213.059	347.586	314.899	444.615	366.409	476.474	361.529	375.362	428.033	314.899	291.758	349.335	326.274	264.735	274.112	253.902	250.606	294.939	262.171	211.431	279.983	229.458
350.01	255.416	355.369	348.35	382.574	369.637	428.817	434.536	413.984	417.864	348.35	314.952	373.627	350.287	248.676	356.836	336.584	289.37	331.886	346.212	197.56	360.105	290.805
356.62	246.47	346.642	376.758	381.281	376.518	439.465	344.222	416.581	371.947	376.758	292.079	404.834	332.608	230.528	371.26	334.665	324.967	309.194	450.169	212.319	377.421	321.663
364.452	253.107	441.142	384.55	409.625	373.817	525.836	342.249	379.888	422.708	384.55	301.805	364.902	388.363	259.254	349.937	318.867	308.394	325.536	378.191	222.02	353.965	321.854
390.865	278.885	382.351	505.477	451.123	477.692	396.151	364.805	423.211	418.622	505.477	278.993	386.326	374.586	250.286	387.954	364.38	331.394	340.407	385.63	214.287	442.993	309.849
380.092	224.693	355.164	432.839	804.027	1000.58	381.101	423.217	399.471	497.033	432.839	259.889	406.047	610.79	233.545	383.48	350.36	330.851	357.806	384.667	318.649	414.861	342.143
327.284	319.227	425.698	414.885	1141.73	1665.38	637.455	769.816	568.135	817.114	414.885	352.002	526.498	1115.02	356.114	339.461	374.539	507.338	460.31	442.828	627.324	485.239	382.174
387.255	585.208	780.567	594.154	903.211	1237.22	1376.59	1046.83	1342.47	1633.7	594.154	620.107	1153.65	1220.37	640.222	532.394	584.057	638.598	1049.1	453.892	766.443	1009.9	848.337
562.015	680.622	798.676	684.489	504.561	585.957	1611.77	964.303	1491.21	1483.29	684.489	699.637	1708.64	624.439	1009.72	897.588	1069.39	549.638	1441.34	788.552	525.596	1442.9	1754.36
873.477	366.833	1496.79	821.516	418.493	482.279	749.857	784.667	1370.16	641.539	821.516	938.93	1006.3	431.647	548.821	1362.6	1314.82	698.963	904.623	1218.59	252.369	915.48	1533.68
1118.25	272.354	1348.59	962.069	399.707	386.187	477.39	508.506	656.362	440.447	962.069	790.563	579.682	340.914	320.382	621.013	744.763	788.133	621.77	1214.9	196.146	516.651	687.698
954.619	313.645	687.829	941.056	306.157	349.331	520.472	583.998	310.307	285.7	941.056	426.124	423.142	452.488	246.407	597.937	339.168	509.724	374.873	773.408	174.287	427.053	408.339
517.398	219.856	478.739	564.899	233.161	325.137	324.031	468.644	284.505	306.228	564.899	432.705	582.283	356.924	205.208	501.281	330.317	535.922	327.386	395.257	171.877	408.628	334.922
383.978	221.6	433.27	438.565	246.971	321.916	306.817	374.56	241.029	294.342	438.565	371.759	448.175	325.389	210.653	333.576	285.052	449.362	292.878	341.523	188.481	277.871	271.375
352.072	195.639	318.151	370.622	227.866	257.112	259.913	268.801	263.823	239.144	370.622	272.06	317.695	271.135	205.484	274.005	273.574	304.208	240.506	303.721	185.376	248.932	237.859
337.127	173.859	257.709	381.686	217.33	259.612	249.878	254.724	241.109	279.111	381.686	278.291	342.631	350.86	192.617	223.476	264.941	281.388	276.148	293.712	185.667	241.735	226.497
308.779	166.291	253.908	351.888	246.152	222.854	230.946	229.647	222.029	227.4	351.888	252.139	264.275	258.456	170.79	337.939	226.146	238.679	234.956	293.234	179.389	216.513	216.663
295.149	172.794	256.691	409.425	227.481	249.418	235.617	218.757	234.505	219.964	409.425	255.335	230.443	302.532	168.929	257.017	238.756	225.715	209.61	293.536	153.421	207.737	210.576
281.359	166.079	240.397	369.75	222.447	256.495	215.357	222.78	216.526	224.739	369.75	235.629	267.156	277.848	177.713	241.561	224.961	234.015	219.268	269.911	191.899	215.675	206.461
263.039	173.97	236.106	290.755	237.476	257.194	269.247	222.46	201.37	253.978	290.755	246.607	235.537	334.696	173.992	461.225	189.45	213.207	212.848	243.98	164.33	213.438	201.068
239.44	172.378	214.493	299.312	287.371	262.281	227.798	228.304	197.609	298	299.312	240.411	236.859	248.495	196.999	341.55	194.481	220.635	209.589	234.768	158.068	227.963	181.185
226.04	162.626	203.585	300.97	203.752	236.491	220.355	219.691	211.518	249.439	300.97	223.929	242.062	231.702	166.869	222.459	202.555	227.598	200.139	238.777	143.129	211.187	235.259
221.531	158.691	220.953	299.167	195.945	250.294	232.838	277.12	209.755	290.711	299.167	206.771	260.807	254.696	167.847	203.576	215.22	219.582	207.171	229.423	164.249	206.989	244.446
221.82	156.093	245.871	280.844	205.576	271.333	213.246	238.691	205.989	242.014	280.844	213.967	215.39	266.917	174.645	284.848	211.663	213.652	192.728	231.258	154.161	212.213	199.432
222.319	162.632	192.493	238.436	202.195	239.228	232.929	245.778	204.008	305.245	238.436	219.684	252.401	238.417	201.964	209.086	208.72	212.071	228.42	221.887	151.745	209.353	228.844
221.043	153.534	198.309	215.574	223.955	235.442	228.199	227.13	203.576	233.636	215.574	213.127	238.35	304.267	164.642	216.291	211.565	229.899	243.365	236.697	168.791	209.838	246.245
209.226	153.256	205.304	228.799	220.968	232.947	205.23	237.274	220.719	216.033	228.799	195.072	236.642	219.858	149.968	195.721	206.691	208.376	214.738	240.111	145.595	223.773	217.712
204.383	151.387	202.843	249.834	190.864	272.238	241.312	223.071	215.569	286.539	249.834	204.875	239.292	208.912	159.155	191.566	215.754	200.858	223.528	219.399	144.455	212.73	216.987
197.428	152.518	199.673	250.853	196.171	273.406	234.613	217.638	199.93	251.189	250.853	202.996	244.17	202.752	171.274	213.316	238.58	205.731	226.857	221.853	145.948	249.967	194.784
210.762	158.753	167.322	239.41	198.593	210.014	197.988	213.113	198	207.864	239.41	216.87	214.594	209.345	160.113	187.301	204.168	205.136	204.768	244.354	153.559	204.682	214.997
231.665	158.153	206.595	244.578	214.178	215.192	220.04	204.695	189.232	204.993	244.578	235.649	223.252	214.763	163.11	219.356	269.428	195.202	219.576	224.46	141.143	236.803	185.274
218.465	157.746	214.867	216.748	186.966	207.622	254.378	203.078	201.901	229.664	216.748	200.627	213.668	195.468	165.264	183.384	202.389	187.901	230.439	237.363	154.676	239.61	224.545
221.501	153.182	237.678	242.808	189.648	223.157	201.967	212.588	227.245	232.539	242.808	205.137	207.655	208.199	167.357	158.725	185.617	190.867	211.017	219.831	150.899	217.641	202.237
188.756	155.268	202.122	195.396	215.483	186.066	184.819	186.24	197.969	266.722	195.396	208.852	247.569	200.458	168.249	162.73	199.317	192.258	243.717	227.371	149.697	228.496	193.589
175.488	162.234	176.155	195.462	205.799	186.324	196.031	206.002	201.115	219.997	195.462	211.649	210.661	204.561	166.811	163.321	193.409	203.724	230.249	223.91	149.333	214.406	201.461
185.442	167.593	168.608	231.423	209.743	208.916	238.721	201.402	206.424	204.15	231.423	216.987	213.502	197.184	168.856	166.703	219.566	202.896	204.802	205.685	147.581	225.895	250.201
178.861	163.191	190.939	215.245	193.956	248.973	223.571	224.649	199.341	217.553	215.245	244.076	213.646	180.368	166.349	165.129	203.862	200.827	201.262	219.995	148.877	180.53	213.039
194.67	165.992	179.863	213.399	210.902	254.664	208.336	199.517	197.667	211.789	213.399	268.098	214.822	182.061	169.886	164.32	182.881	208.027	190.456	224.016	149.75	194.015	172.498
216.294	171.925	178.608	232.478	275.123	358.084	201.239	231.396	199.77	275.144	232.478	327.62	235.79	206.023	189.663	177.553	222.224	224.15	218.745	217.847	163.933	178.739	170.081
247.283	169.081	205.86	328.115	311.127	744.692	220.176	229.569	275.573	361.203	328.115	513.913	278.174	240.292	215.077	175.649	253.914	272.687	227.124	204.752	204.299	176.875	190.136
304.388	176.459	253.671	431.587	354.418	630.436	274.305	234.707	353.833	464.539	431.587	497.052	332.464	302.419	230.176	182.398	231.211	451.507	252.721	233.243	217.24	203.075	184.136
577.107	206.243	351.23	675.897	324.629	468.071	527.314	288.661	399.034	498.136	675.897	316.463	437.019	528.846	307.595	254.55	282.858	443.192	328.996	280.187	224.05	297.75	201.995
556.142	226.24	373.741	747.263	278.72	357.005	726.242	414.797	385.854	593.836	747.263	252.352	451.86	491.279	343.907	401.361	353.141	347.555	471.342	314.89	218.165	414.474	321.445
368.734	342.56	475.523	595.063	314.378	291.391	508.256	560.803	302.096	407.253	595.063	229.554	563.429	342.549	294.254	347.364	443.122	268.617	474.025	584.345	236.275	650.131	462.581
339.229	266.787	336.259	426.501	270.949	248.637	340.967	294.985	313.768	258.147	426.501	223.595	354.077	320.86	256.925	273.177	378.829	292.394	337.625	784.82	238.569	384.733	396.417
276.209	205.808	251.53	296.921	202.087	233.865	304.432	272.876	286.359	281.417	296.921	217.753	361.326	343.176	248.714	273.856	346.884	221.707	312.416	430.697	204.931	303.507	349.368
223.754	213.584	252.833	258.627	219.305	391.831	260.498	270.119	219.002	285.742	258.627	197.798	276.013	235.731	277.566	201.526	260.965	206.735	276.637	317.007	211.137	347.235	296.49
197.182	197.736	295.232	229.351	234.106	394.053	246.087	250.414	244.711	307.008	229.351	197.257	271.861	262.831	286.513	178.72	233.031	251.003	242.439	301.805	211.044	256.216	261.013
242.978	182.015	254.106	270.342	265.67	358.383	299.767	249.473	381.594	327.553	270.342	189.533	380.409	380.238	237.143	168.863	220.095	310.774	209.88	269.002	189.932	227.478	224.942
426.774	174.31	386.906	480.103	199.573	202.421	355.089	416.517	502.263	537.303	480.103	183.887	613.646	392.081	271.873	167.861	275.945	298.781	266.274	323.07	195.65	405.544	278.492
413.822	167.66	436.698	546.642	180	177.607	372.92	386.377	229.248	503.541	546.642	180.839	298.245	318.912	233.905	164.704	345.158	206.078	338.81	401.927	193.779	539.494	576.105
334.071	174.963	260.516	337.962	174.11	171.918	286.962	265.845	201.716	239.447	337.962	200.995	204.249	198.186	176.62	172.755	323.573	180.732	290.485	397.547	166.439	444.193	329.378
217.089	171.935	209.615	319.344	176.869	166.23	219.618	215.207	191.421	212.078	319.344	222.003	192.228	178.431	172.904	168.225	201.422	171.117	211.74	262.336	157.865	247.596	229.026
202.299	164.305	168.788	239.915	187.396	187.396	197.941	193.772	193.772	200.3	239.915	206.119	186.708	167.012	165.2	164.447	191.67	163.519	186.352	206.768	158.714	182.338	183.289
184.726	165.439	156.137	185.059	177.17	177.17	176.678	179.493	179.493	202.122	185.059	206.552	180.639	163.637	164.755	159.193	178.27	162.91	176.819	207.313	152.672	169.85	163.286
ceh-34(ot1014) - fluorescence intensity
worm1	worm2	worm3	worm4	worm5	worm6	worm7	worm8	worm9	worm10	worm11	worm12	worm13	worm14	worm15	worm16	worm17	worm18	worm19	worm20	worm21	worm22	worm23	worm24	worm25
129.16	85.2606	118.257	125.147	96.3627	83.9256	87.6054	92.3705	106.954	90.7039	138.815	113.135	120.477	69.8176	109.069	144.124	96.912	104.159	75.298	81.6026	86.5629	86.1464	131.417	153.958	194.33
167.401	85.1905	123.573	163.647	143.079	82.4897	108.46	85.1148	129.961	88.0725	150.598	132.638	165.468	71.8916	137.238	158.652	115.75	128.921	79.7576	79.7482	123.133	105.577	224.389	155.68	185.98
140.821	92.7547	128.334	180.937	154.331	84.0903	120.931	82.585	130.004	91.0807	138.906	163.442	169.874	72.4615	149.907	144.984	119.995	152.102	89.7466	80.2015	139.566	114.406	148.076	163.75	187.58
122.704	111.249	130.772	194.433	150.075	82.1718	139.7	83.8312	115.938	96.9675	132.294	170.099	142.955	74.7226	131.461	130.869	127.034	149.075	97.9385	81.5943	179.875	118.452	148.248	168.025	181.923
121.998	120.166	128.804	172.722	145.182	86.7935	139.822	83.2094	121.468	105.189	135.591	154.512	149.464	82.3965	127.093	131.177	132.233	143.498	104.725	81.0054	166.618	123.549	144.339	170.119	181.009
135.738	122.954	134.691	163.006	160.415	92.047	137.034	84.2854	121.681	109.023	137.873	152.097	150.748	91.9343	143.515	130.654	136.058	145.52	107.715	84.1025	156.302	126.265	135.53	161.368	187.424
141.552	130.421	127.421	164.189	166.737	92.0357	140.561	83.289	125.259	112.798	140.259	161.469	160.126	101.69	197.758	132.548	142.516	146.656	112.144	92.2065	175.239	129.391	141.154	157.449	186.9
130.419	135.841	127.016	161.048	172.224	103.549	147.124	83.8298	126.384	109.56	146.233	157.746	167.368	111.005	168.306	135.993	145.953	155.886	115.089	102.351	173.741	138.982	150.378	159.934	183.359
129.805	137.196	128.525	158.584	173.682	111.674	148.332	85.6312	131.094	111.169	148.356	148.327	164.74	118.523	147.624	139.398	150.813	153.33	117.997	112.73	167.433	149.596	167.089	159.356	183.245
130.917	138.249	123.549	158.287	170.88	114.495	148.357	86.7294	134.257	114.949	150.302	144.43	166.354	126.701	119.243	144.534	152.436	156.506	121.651	125.695	165.65	169.031	151.403	166.888	190.571
134.942	144.368	126.248	153.337	179.936	122.326	157.864	86.4054	134.027	115.066	156.996	146.868	176.299	133.126	125.01	150.768	158.32	170.278	123.455	139.411	157.913	189.024	165.225	161.443	191.687
139.266	147.784	134.374	162.71	175.344	121.642	158.551	88.923	137.41	121.93	159.974	163.341	200.042	145.944	116.198	144.923	162.809	185.843	128.888	148.527	161.447	185.679	166.599	168.958	194.669
140.418	153.093	152.592	160.154	204.462	126.079	154.46	98.5	140.464	124.705	173.781	159.78	190.011	193.377	110.937	150.45	175.72	174.894	137.642	153.495	163.363	200.977	161.815	159.443	190.36
142.494	158.96	149.035	156.67	253.217	124.18	152.796	98.5418	145.375	129.778	180.558	141.178	186.511	163.391	113.979	153.22	176.685	176.753	144.719	159.501	180.892	280.885	183.143	159.235	188.879
156.345	176.442	176.93	160.656	198.609	136.871	154.099	106.784	152.219	131.469	196.072	150.732	167.947	166.987	116.508	155.871	181.729	183.339	148.584	165.74	171.449	251.039	171.214	165.171	203.008
153.185	198.467	182.6	161.507	220.401	144.918	174.898	118.957	149.91	134.347	208.724	150.341	178.426	178.919	117.719	170.312	177.482	184.798	151.418	165.849	154.956	217.851	167.777	199.29	205.163
154.714	198.707	166.773	190.932	298.15	142.905	192.573	147.886	144.488	140.54	230.94	156.183	181.168	209.161	121.915	223.993	189.695	207.638	162.366	172.796	159.194	224.971	177.203	174.792	212.046
163.032	196.69	176.692	187.883	244.588	145.27	182.967	148.693	151.082	141.585	230.096	151.845	173.579	216.829	173.51	193.27	199.795	191.554	182.784	168.56	168.029	235.654	177.462	174.339	205.093
164.887	202.753	174.252	181.677	206.665	146.696	190.987	163.567	175.169	145.813	218.042	139.501	176.481	215.931	151.507	181.368	193.061	197.384	175.095	178.01	230.38	213.323	182.776	182.161	204.308
205.042	209.19	176.555	202.487	220.494	159.542	192.945	188.288	181.051	150.255	228.691	137.78	175.714	261.537	129.912	174.081	210.989	201.533	169.731	180.3	262.723	244.506	180.19	184.896	206.393
221.871	203.048	173.948	187.394	230.759	164.604	182.48	184.619	242.282	155.244	220.798	138.122	234.306	230.764	134.356	180.593	200.51	189.091	167.782	182.762	302.339	245.619	179.16	188.348	218.17
188.583	199.846	186.366	188.032	253.181	169.042	170.969	196.392	261.458	155.984	222.133	138.958	189.903	229.456	129.941	194.004	195.657	194.482	188.03	189.573	258.443	229.754	184.105	193.263	207.165
182.393	194.599	188.542	171.452	251.43	171.01	174.525	190.057	173.518	164.596	233.1	145.899	197.516	250.591	132.555	192.615	194.754	195.338	181.666	196.515	369.405	251.767	198.141	186.21	198.595
168.016	211.608	203.886	177.375	248.07	169.832	176.429	226.253	158.47	177.381	239.181	142.147	232.544	250.653	131.317	189.966	195.57	272.211	174.762	195.237	285.997	243.117	196.547	182.421	196.958
168.802	230.013	196.628	192.459	274.41	174.017	178.297	197.189	161.543	191.489	228.938	142.486	218.298	262.143	137.333	209.151	201.284	240.709	178.859	197.085	281.69	260.183	243.254	187.368	210.456
171.686	260.718	218.431	205.475	257.756	181.604	177.299	239.677	162.612	182.793	263.741	175.608	186.892	274.502	137.667	220.745	218.772	228.39	190.906	204.34	267.009	242.248	210.142	188.565	238.837
176.98	287.762	198.707	213.039	240.596	232.467	172.122	222.612	166.688	202.988	263.759	162.251	188.227	228.488	144.619	222.587	223.569	198.919	208.563	205.554	255.416	240.727	226.771	190.362	220.877
176.008	280.238	201.429	213.204	265.69	207.403	172.441	273.095	162.035	192.614	266.196	156.268	180.094	259.4	161.717	217.961	213.973	189.629	190.399	226.522	240.265	271.12	331.33	181.417	221.068
184.472	295.231	201.135	217.501	312.728	210.023	171.389	247.208	162.509	199.202	265.196	153.232	185.883	288.778	163.655	215.394	212.218	193.246	200.369	232.611	309.182	286.942	319.841	195.46	213.258
181.764	267.791	217.389	211.217	341.4	221.887	185.415	300.836	165.918	188.827	268.187	158.376	212.443	269.448	173.506	216.156	211.662	193.238	215.478	258.003	306.708	326.487	260.152	189.869	208.692
185.192	281.408	224.424	217.462	371.586	212.595	191.34	350.188	166.988	189.597	290.221	161.561	203.689	263.263	219.467	213.358	211.78	189.509	208.631	272.567	195.722	346.435	251.883	186.915	214.506
189.827	388.548	280.429	261.346	349.156	228.442	193.449	286.939	164.442	200.77	303.77	157.333	212.961	392.891	153.578	234.202	228.323	188.284	220.304	237.543	295.795	356.034	247.89	199.381	240.573
204.933	312.702	289.019	266.16	321.229	234.908	186.566	259.177	165.392	208.348	285.035	162.751	219.28	329.369	147.824	292.113	215.758	187.745	301.889	243.958	219.858	433.771	310.08	227.11	226.161
218.195	328.166	293.453	268.081	284.688	242.627	189.744	286.832	169.61	208.614	263.926	158.874	220.882	342.481	151.371	232.568	223.691	185.325	282.331	274.22	252.293	350.146	329.182	210.368	260.767
245.226	356.113	408.339	267.687	275.677	245.266	199.761	268.562	175.497	214.404	243.071	195.769	222.674	352.63	154.681	224.319	274.408	217.477	298.622	296.126	303.38	389.511	324.813	201.276	248.629
214.339	401.798	485.834	283.425	284.476	262.375	221.448	293.794	170.974	207.454	239.7	184.422	248.019	305.867	157.481	224.337	209.418	212.406	355.36	282.764	262.813	306.154	255.829	215.898	344.531
220.026	483.846	333.584	299.45	258.098	332.962	223.974	332.223	188.681	200.915	236.074	188.866	243.189	309.305	164.01	244.077	214.521	210.111	273.385	281.859	312.178	341.963	258.244	200.566	317.79
253.514	626.441	330.427	291.725	269.219	372.269	245.916	271.343	212.087	215.133	230.556	224.652	280.416	438.023	198.132	345.482	207.871	226.277	213.162	357.945	320.063	365.095	281.427	200.604	316.174
253.571	456.978	287.839	315.296	428.214	354.946	207.526	263.469	287.323	208.105	225.159	177.09	289.914	439.42	265.754	259.156	230.742	207.488	228.274	335.077	296.187	433.631	270.956	204.689	358.984
226.895	443.789	252.61	338.907	539.397	282.469	203.149	300.589	350.584	224.22	229.989	171.921	355.371	394.002	304.545	237.74	254.082	212.839	203.42	454.413	308.601	478.174	274.809	223.002	363.473
245.92	456.198	231.705	404.983	572.948	255.835	219.133	319.061	284.923	239.69	225.884	168.291	418.93	484.048	218.557	246.048	242.045	222.83	236.978	383.948	290.321	518.764	259.339	249.843	466.28
266.696	425.742	232.058	403.957	386.305	251.826	233.201	319.038	289.129	241.327	207.567	181.96	402.929	378.407	200.346	282.421	206.923	222.315	224.105	375.195	269.812	386.281	226.581	252.93	348.32
307.133	362.481	231.595	290.812	411.855	236.139	239.023	360.491	203.797	246.602	217.011	190.428	447.233	354.222	184.461	290.258	228.256	259.452	243.716	342.225	469.543	386.636	232.513	223.188	473.403
365.041	434.302	194.868	320.145	429.073	230.556	237.236	442.227	195.1	261.724	241.062	203.049	336.277	296.128	197.399	347.315	228.526	304.354	243.929	343.062	650.244	393.623	216.254	220.087	474.915
391.242	573.467	182.622	526.491	341.388	212.267	230.792	608.43	214.457	222.276	240.898	215.329	375.317	333.864	245.326	278.48	221.681	290.794	300.623	388.148	493.361	401.202	220.575	237.312	508.599
278.073	283.24	201.492	913.455	362.242	219.423	244.567	789.487	234.706	227.487	218.406	199.747	414.32	325.599	203.743	383.753	285.378	270.064	248.285	403.725	635.82	362.312	211.386	260.116	588.6
233.81	246.982	193.587	519.82	286.349	237.267	223.079	572.639	195.851	243.462	217.161	198.328	284.202	302.311	193.581	735.975	242.457	268.678	184.142	422.842	525.414	341.192	231.319	271.782	476.812
282.506	241.211	177.164	274.735	309.464	301.082	216.073	584.174	191.42	278.414	216.196	204.931	337.291	361.928	223.934	356.677	238.536	293.528	176.414	430.144	617.121	342.439	215.442	275.888	474.592
273.466	314.337	300.815	286.435	329.561	242.623	220.181	611.895	196.623	325.425	221.756	221.858	306.777	334.113	380.664	288.74	269.474	257.447	239.091	409.438	507.308	353.908	177.913	295.576	538.336
373.706	306.187	293.526	253.226	409.509	259.351	215.794	511.876	202.857	257.222	208.448	232.288	308.2	339.232	307.027	313.491	260.501	262.684	207.275	535.689	454.848	412.634	182.596	253.966	539.286
361.812	492.813	245.652	258.352	565.071	479.412	231.081	424.401	219.704	259.549	216.442	205.344	385.712	324.021	268.647	327.358	494.14	236.546	166.341	676.963	391.839	405.074	191.814	251.526	540.731
291.966	390.178	336.905	296.772	822.34	358.957	281.474	511.787	232.132	266.498	233.849	252.931	559.87	358.257	231.789	444.534	683.091	255.908	191.612	653.837	403.162	318.926	194.614	292.546	461.909
286.248	531.055	317.864	360.403	510.881	240.901	267.238	661.535	245.544	315.488	273.752	270.201	662.994	418.519	236.546	499.314	443.366	258.802	187.533	561.505	428.023	383.593	198.475	361.49	468.07
349.486	333.147	365.928	307.618	583.568	311.134	303.911	578.854	263.76	370.79	242.37	240.275	408.748	584.74	278.214	459.183	360.644	261.132	186.968	551.198	363.098	462.987	193.289	485.678	561.776
332.577	422.117	370.185	272.582	579.936	257.741	236.163	781.295	265.384	549.372	253.404	282.265	333.848	463.245	376.219	380.244	312.12	316.908	203.353	495.356	422.927	509.508	214.728	381.873	477.628
276.974	651.722	217.15	375.926	366.132	346.802	264.208	742.374	281.227	510.02	358.052	236.964	315.2	420.816	358.387	425.24	373.313	357.038	223.397	582.3	598.966	341.24	245.224	264.765	480.762
240.347	549.368	225.827	334.407	458.765	415.085	317.706	923.497	243.802	599.189	279.658	229.298	374.996	316.795	356.238	484.12	453.357	372.637	308.874	676.136	591.172	415.465	265.244	267.954	621.942
224.137	487.659	327.633	540.387	796.726	475.417	341.373	774.155	284.04	557.77	343.217	203.333	519.864	435.496	331.407	375.301	675.067	450.009	446.684	651.81	415.55	446.199	341.046	255.015	433.798
332.714	609.765	353.023	948.55	358.365	652.061	313.814	817.758	303.504	919.902	508.752	237.547	511.803	664.312	479.772	376.792	726.273	330.046	509.044	641.23	453.615	389.599	444.093	254.021	549.847
363.661	1110.66	310.422	1059.98	632.921	617.717	396.56	507.223	307.536	990.511	337.171	331.272	441.51	783.891	342.718	361.389	694.558	328.209	370.038	644.777	576.902	270.015	474.13	329.106	448.815
542.04	1194.52	505.312	1075.13	1036.77	548.316	432.01	406.491	416.206	636.739	318.054	302.781	618.969	549.218	500.073	432.701	410.104	296.382	324.614	465.295	670.134	272.056	558.514	462.813	497.301
398.778	738.818	601.947	892.335	863.019	612.616	394.092	446.114	539.813	585.301	315.774	273.351	889.116	577.873	687.042	356.093	369.316	281.281	227.516	410.284	710.223	523.843	587.733	818.811	675.923
299.581	619.414	679.883	863.776	977.261	680.498	443.602	482.645	451.44	559.773	285.495	364.837	873.079	823.567	707.184	378.577	393.179	409.625	265.651	477.052	796.732	408.022	583.143	824.015	785.565
388.445	577.795	657.832	788.749	851.635	622.66	728.753	395.853	684.291	638.989	442.707	607.049	852.723	824.056	613.995	533.045	485.279	513.722	324.575	458.276	970.724	394.662	456.42	1090.25	606.768
276.812	438.766	456.933	743.263	868.673	506.906	1125.1	366.512	705.804	403.913	575.133	800.771	864.196	1018.52	527.126	608.251	619.776	829.311	401.908	328.038	990.315	462.628	438.14	1439.36	732.391
466.851	543.819	381.106	537.026	688.013	453.453	975.137	623.928	610.568	450.577	528.239	781.579	976.785	961.95	616.228	734.407	823.769	1099.16	412.107	250.271	508.694	432.36	426.869	753.301	850.923
518.986	577.68	446.318	597.756	677.91	393.798	577.698	751.556	558.152	421.773	1249.96	596.648	928.602	606.143	640.497	967.564	962.345	1081.06	385.273	196.814	462.272	304.006	354.22	641.116	978.464
629.75	405.734	457.711	648.557	673.299	519.115	345.914	485.865	680.995	339.735	1303.55	500.731	737.027	657.558	401.412	781.332	558.279	1658.41	542.026	186.827	657.018	461.212	348.856	768.966	786.053
898.53	457.377	415.877	513.329	401.382	559.302	261.56	280.482	652.207	335.238	1072.98	625.254	725.272	599.078	491.53	791.036	328.549	1426.22	533.479	177.915	665.332	580.293	413.482	729.706	610.762
612.728	637.506	334.991	554.437	371.526	498.847	284.901	220.169	480.011	328.389	515.556	501.479	813.573	572.342	326.95	839.894	504.024	927.909	512.113	182.218	930.353	573.278	459.15	514.015	781.448
672.554	502.597	236.956	484.468	299.427	491.137	330.924	243.47	436.423	302.471	386.36	300.008	685.207	433.458	255.752	508.52	508.26	684.99	525.897	229.326	649.992	542.28	416.573	498.759	756.543
550.049	647.691	210.172	305.078	307.982	323.842	318.941	292.049	588.748	287.368	299.533	413.795	730.809	345.089	282.821	696.168	603.924	661.702	576.904	262.114	823.77	452.195	453.781	348.78	818.252
732.161	589.458	216.365	246.828	284.335	286.809	250.767	263.835	596.179	273.519	402.391	427.122	519.879	320.351	416.112	739.556	593.16	533.782	553.043	244.235	1116.46	321.759	342.442	321.436	590.834
584.885	462.355	254.389	281.81	430.75	343.283	310.818	214.454	369.498	189.762	364.796	259.7	464.282	281.443	676.826	442.377	723.959	395.37	362.9	197.11	810.229	282.95	200.998	357.279	670.933
334.464	500.683	297.937	271.842	462.197	242.72	216.451	195.351	309.427	197.742	367.998	259.719	385.492	354.182	369.404	495.64	401.39	386.729	457.159	191.428	496.447	244.126	180.57	357.962	411.325
339.151	565.914	272.535	199.733	469.184	299.745	238.178	232.894	337.704	182.276	655.149	403.179	454.691	433.353	253.965	458.635	250.051	424.612	503.683	190.468	380.848	236.273	197.012	307.921	521.333
393.139	397.196	228.052	168.419	317.128	201.837	341.598	187.49	596.7	171.406	800.011	395.808	474.456	347.055	343.599	459.713	257.86	353.498	590.899	206.062	647.226	192.455	172.503	244.032	707.282
350.75	415.027	177.984	165.681	340.868	279.37	371.375	233.049	443.159	145.273	763.687	245.552	493.961	542.112	332.752	577.774	308.604	485.906	353.085	260.802	747.112	190.475	166.479	192.581	541.241
347.639	551.857	195.737	158.931	282.746	190.066	329.441	161.854	340.729	142.452	865.64	269.295	413.058	411.914	436.055	929.718	333.816	274.38	218.066	291.131	442.527	157.627	173.944	258.136	369.145
342.631	440.528	204.375	165.966	282.515	193	279.942	148.798	330.777	168.687	812.126	254.672	383.567	406.576	317.209	740.955	346.982	296.968	215.856	288.025	291.184	175.351	150.945	432.661	262.82
286.75	485.487	161.118	163.656	396.596	171.939	286.03	164.447	482.461	148.799	556.179	217.653	419.283	580.427	544.933	460.398	289.534	377.97	195.796	245.458	365.061	241.245	152.389	614.458	231.853
253.02	752.447	151.54	176.315	388.624	225.692	329.758	179.55	327.177	166.805	402.502	218.001	392.074	460.673	448.822	346.735	452.692	322.645	206.218	284.082	403.825	244.159	200.747	316.388	239.503
399.744	591.705	144.499	179.67	367.781	319.248	426.419	208.27	191.999	154.308	450.444	266.362	331.204	287.952	276.669	471.844	511.468	411.273	230.533	473.702	509.433	226.69	285.301	238.731	319.472
523.272	468.103	142.518	196.735	332.748	252.816	472.813	287.966	198.803	152.43	523.555	319.628	261.113	389.118	289.876	1013.84	373.566	348.811	280.209	457.636	496.977	191.489	226.355	375.687	287.145
259.675	589.293	144.595	222.8	295.033	231.484	398.467	544.993	301.272	172.743	669.393	393.483	207.175	345.059	326.699	950.221	310.212	286.316	345.178	328.495	520.784	160.712	185.056	359.243	232.288
264.24	403.718	158.141	305.201	382.5	211.849	358.408	377.684	527.349	202.577	1064.09	481.934	202.275	284.391	351.484	693.267	324.556	339.434	397.366	341.584	679.038	155.562	173.483	446.047	201.668
339.992	368.075	248.521	519.916	309.752	237.064	229.368	290.704	356.57	223.919	654.033	500.892	164.796	353.525	254.19	602.66	272.343	423.329	340.044	482.369	729.073	186.47	159.611	458.547	210.321
747.831	286.209	223.881	311.561	380.602	422.089	222.104	282.749	404.193	237.187	584.848	332.324	167.517	822.975	377.322	545.995	216.189	410.365	255.97	307.2	593.818	207.803	156.653	665.767	238.935
476.754	273.907	173.053	391.876	922.285	478.205	242.264	231.968	309.564	184.585	705	376.878	224.778	1033.03	515.459	275.263	257.588	307.693	211.512	221.018	409.957	204.218	153.108	982.735	389.082
388.167	231.665	181.307	440.876	1471.64	931.373	253.099	189.996	250.235	181.16	665.313	463.822	293.013	806.604	419.778	319.226	614.027	208.566	254.103	187.188	368.179	212.436	157.203	791.206	531.246
433.329	232.729	168.433	335.493	832.816	1093.19	228.231	155.736	211.454	177.87	610.506	338.719	443.825	517.031	293.443	576.021	461.68	268.141	251.476	178.218	491.167	182.678	155.755	555.936	454.685
374.839	239.425	178.863	496.593	321.695	1687.59	260.178	146	218.494	162.952	362.442	366.301	283.942	706.739	370.698	294.267	301.474	205.009	208.41	180.013	522.479	152.108	185.7	489.987	808.182
238.518	214.121	185.102	342.577	213.032	1136.68	258.33	136.857	233.388	166.139	249.826	352.375	244.505	467.121	308.808	194.801	314.165	296.459	210.015	180.008	501.068	148.931	239.905	393.22	385.373
201.175	211.161	325.324	229.315	184.818	448.506	244.355	131.812	307.326	173.152	239.009	440.161	486.753	253.832	295.197	196.552	235.019	286.088	200.191	215.081	396.927	145.166	281.254	340	305.209
230.818	206.612	467.544	268.905	183.671	318.698	295.567	133.412	325.593	173.722	234.042	439.721	357.756	217.706	233.506	188.925	315.841	229.398	183.04	241.184	283.4	144.938	203.698	358.434	212.599
247.522	187.877	378.975	299.362	241.785	443.727	304.346	135.723	291.813	179.254	279.189	439.387	181.155	255.715	311.982	201.368	317.589	223.391	235.036	330.026	318.358	147.012	154.315	383.106	227.798
248.048	193.698	254.123	216.908	277.207	649.882	288.003	137.58	223.235	188.503	302.69	388.385	162.597	312.729	291.113	213.077	271.922	346.726	217.088	384.117	197.41	148.309	153.044	190.204	435.327
279.29	184.854	204.736	237.71	357.684	414.929	222.177	135.827	208.817	173.746	286.089	297.019	159.673	322.466	222.37	207.296	208.059	299.121	201.345	225.168	143.737	143.442	147.699	176.47	386.847
372.504	169.938	269.157	241.794	704.415	274.963	167.68	139.169	192.288	170.932	188.776	310.985	159.374	279.432	187.434	197.389	187.066	260.436	184.455	169.693	148.343	144.566	150.497	173.017	225.889
613.104	161.188	270.379	180.054	371.555	251.992	157.174	141.751	157.65	217.18	159.732	218.85	154.594	167.435	183.473	192.803	191.786	173.626	166.123	162.89	140.987	147.262	153.495	173.725	199.327

## Sheet: Fig.9
Fig.9B
eya-1	ON	DIM
wt	20	0
ceh-34(tm3733)	0	20
Fig.9C
unc-17Prom	ON	OFF		unc-17Prom	ON	OFF
wt I1	40	0		wt I1	50	0
eya-1(ok654) I1	26	14		eya-1(ot1197) I1	33	17
wt MC	40	0		wt MC	50	0
eya-1(ok654) MC	40	0		eya-1(ot1197) MC	45	5
wt M4	20	0		wt M4	25	0
eya-1(ok654) M4	19	1		eya-1(ot1197) M4	21	4
wt M1	20	0		wt M1	25	0
eya-1(ok654) M1	6	14		eya-1(ot1197) M1	11	14
wt M2	40	0		wt M2	50	0
eya-1(ok654) M2	2	38		eya-1(ot1197) M2	1	49
eat-4Prom	ON	OFF
wt M3	40	0
eya-1(ok654) M3	34	6
wt MI	20	0
eya-1(ok654) MI	0	20
wt I5	20	0
eya-1(ok654) I5	20	0
tph-1Fosmid	ON	OFF
wt NSM	80	0
eya-1(ok654) NSM	73	7

## Sheet: Fig.10
Fig.10A
cat-1Prom	ON	DIM	OFF
wt NSM	20	0	0
ceh-34(n4796) NSM	20	5	1
unc-86(n846) NSM	0	16	0
n4796; n846 NSM	0	9	19
Fig.10B
unc-17Prom	ON	OFF
wt I1	22	0
ceh-34(n4796) I1	38	0
unc-86(n846) I1	31	1
n4796; n846 I1	28	22
Fig.10C
eat-4Fsomid	ON	DIM	OFF
wt I2	20	0	0
ceh-34(n4796) I2	46	0	0
ceh-14(ot900) I2	42	0	0
n4796; ot900 I2	28	18	18
Fig. 10D
unc-17Fosmid	ON	OFF
wt I3	14	0
pros-1(mc41) I3	7	11
Fig.10E
ser-7CRISPR	ON	OFF
wt I3	14	1
ceh-2(ch4) I3	4	11
Fig.10F
unc-17CRISPR	ON	DIM	OFF
WT I3	15	0	0
ceh-34(n4796) I3	0	11	4
ceh-2(ch4) I3	0	15	0
n4796; ch4 I3	0	0	15

[truncated: 6 more sheets: Fig.11, Fig.2S2, Fig.6S2, Fig.8S1, Fig.8S2, Fig.11S1]
