# Supplementary figures and images for: The enteric nervous system of the C. elegans pharynx is specified by the Sine oculis-like homeobox gene ceh-34
Source: eLife journal article supplement (doi:10.7554/elife.76003), 2022-03-24

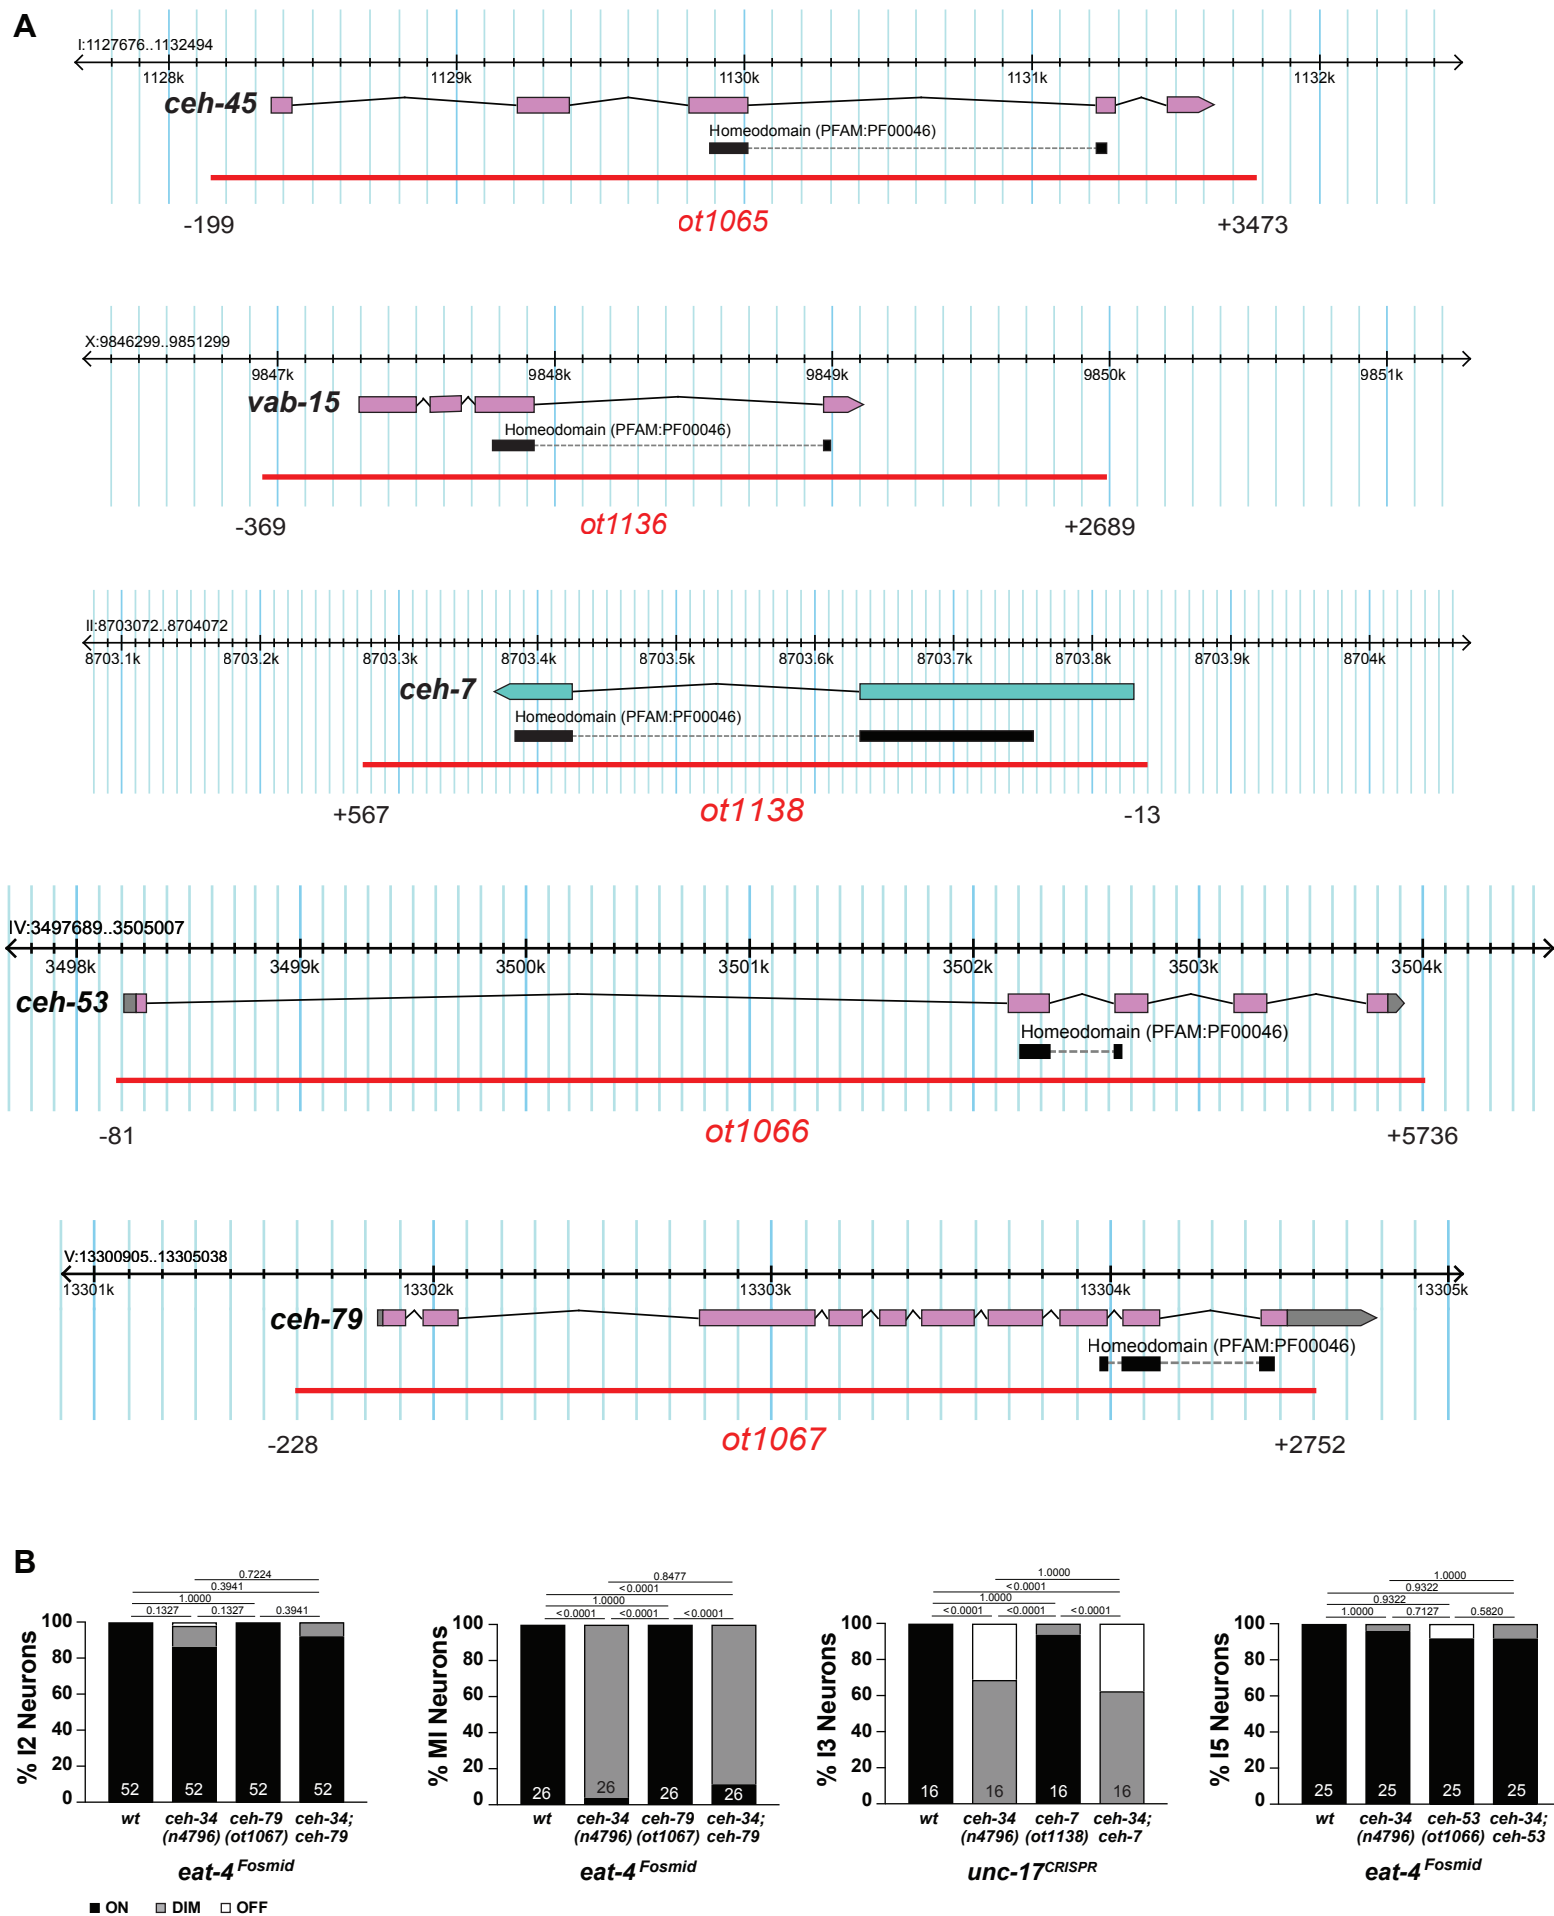

Figure 11 - Supplement 1

Supplement: supp [file elife_poa_e76003_Figure_11_figure_supplement_1.pdf › elife_poa_e76003_Figure_11_figure_supplement_1.pdf]

*Ex [ehs-1p::ttx-3 genomic, ehs-1p::unc-86 genomic, rol-6(d)]*

*tph-1p::gfp*

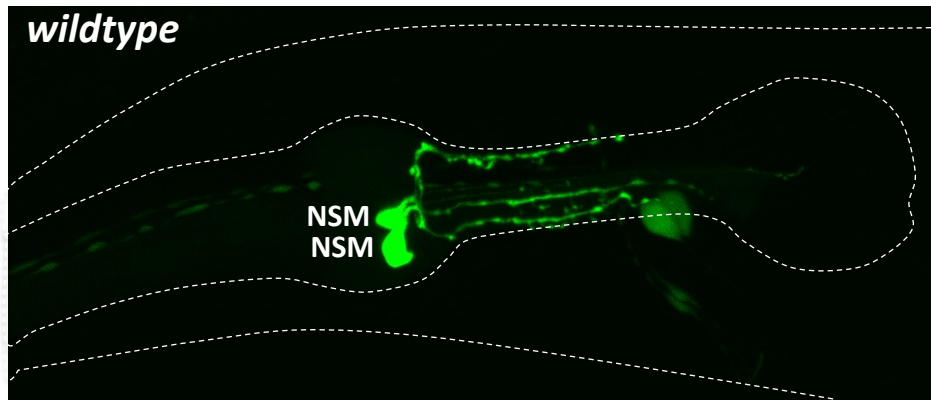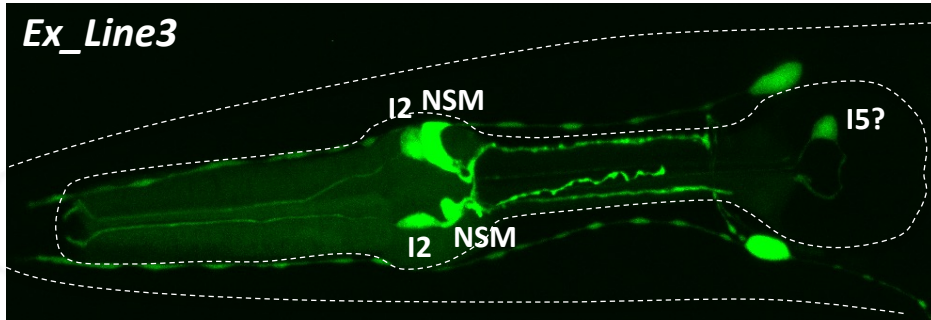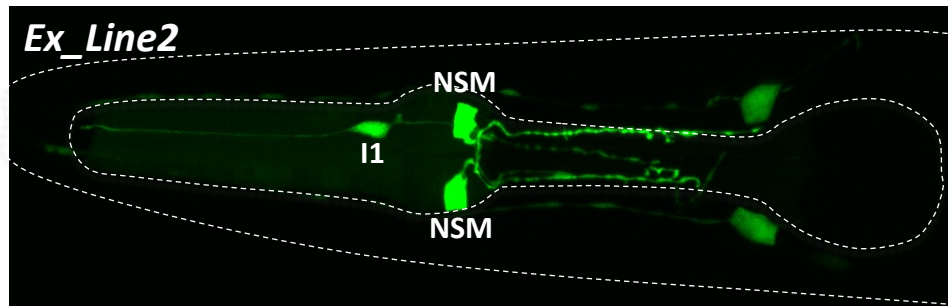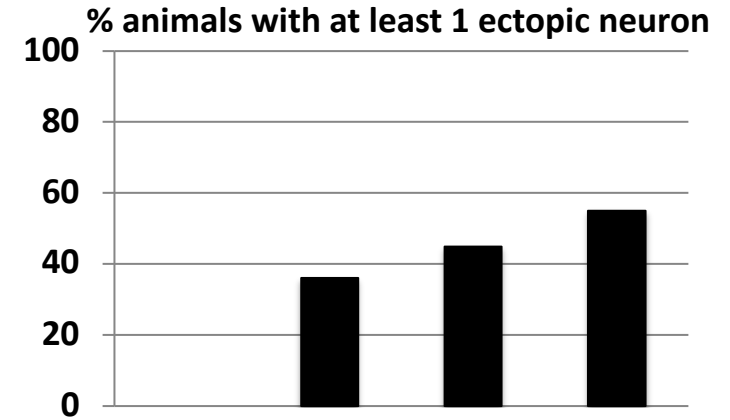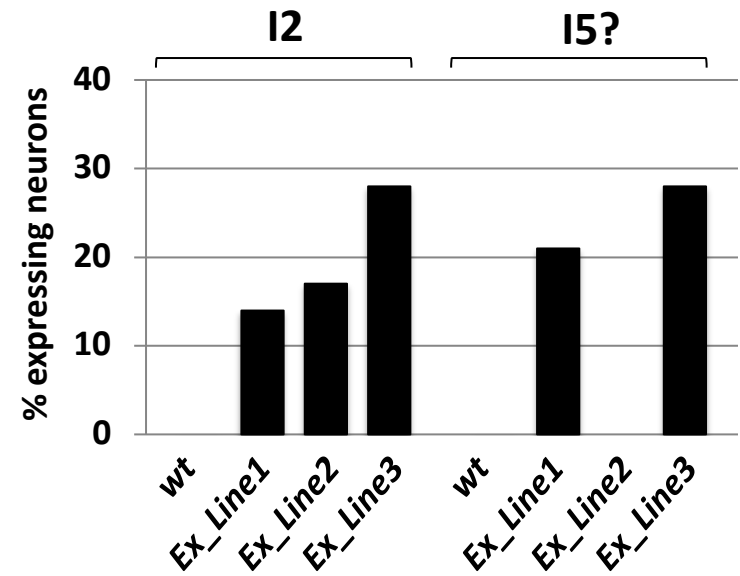

Figure 11 – Supplement 2

Supplement: supp [file elife_poa_e76003_Figure_11_figure_supplement_2.pdf › elife_poa_e76003_Figure_11_figure_supplement_2.pdf]

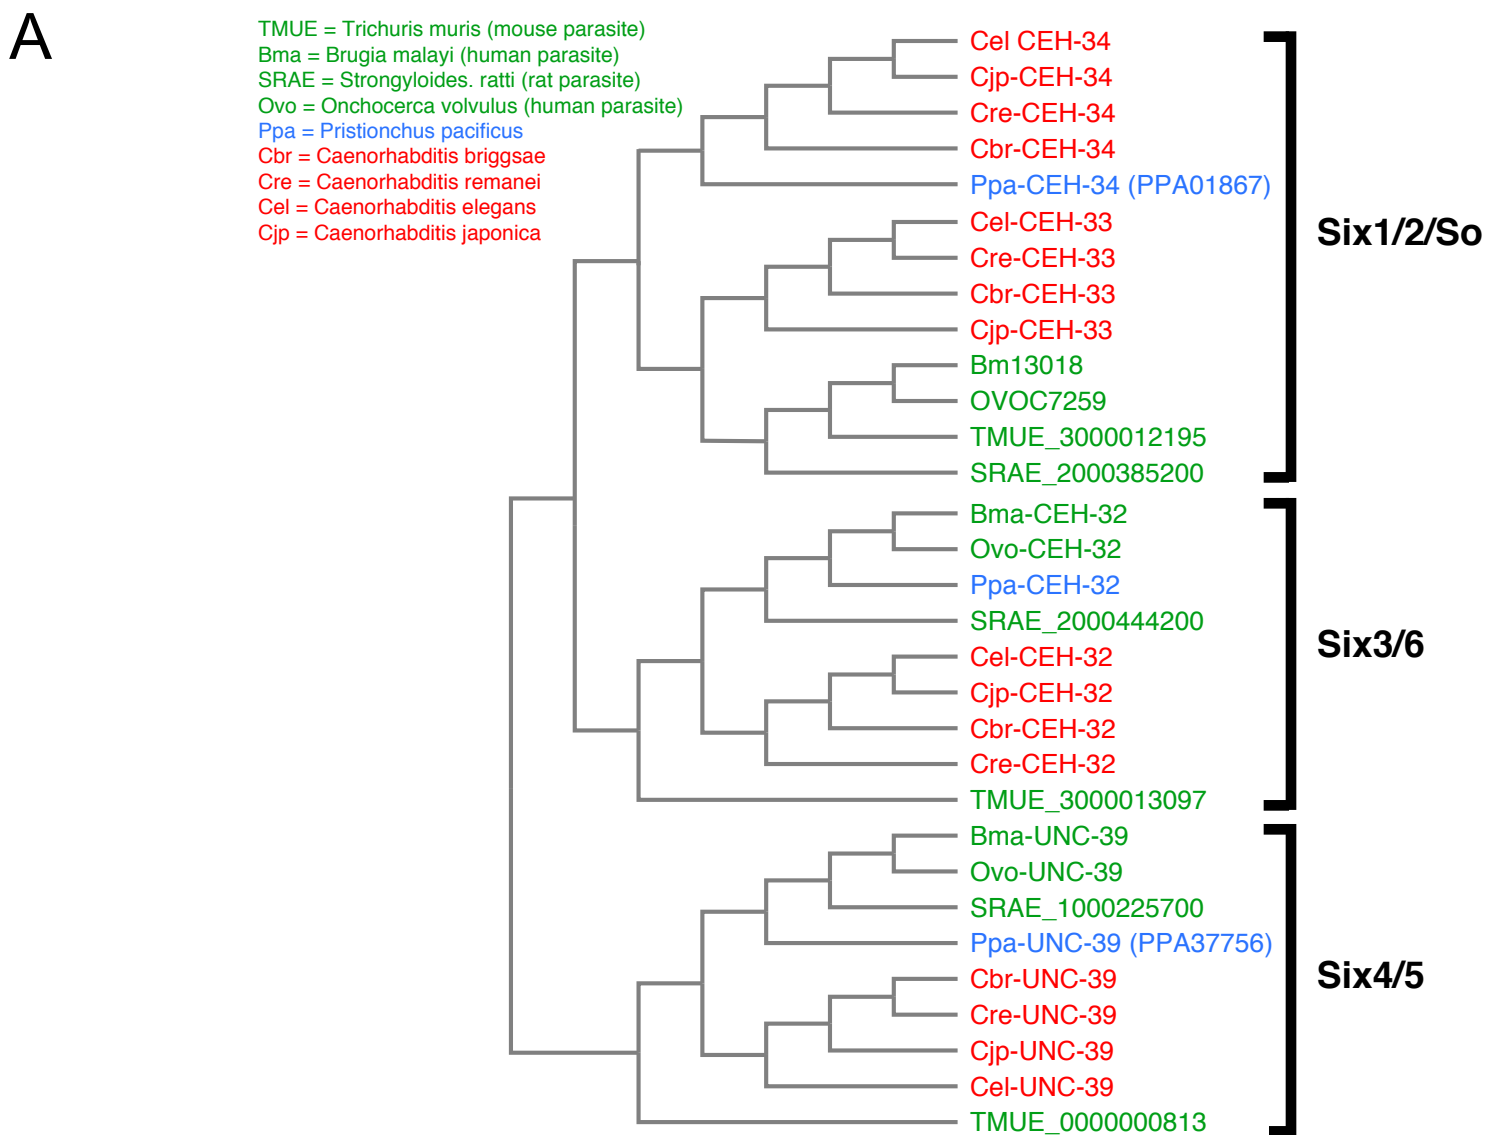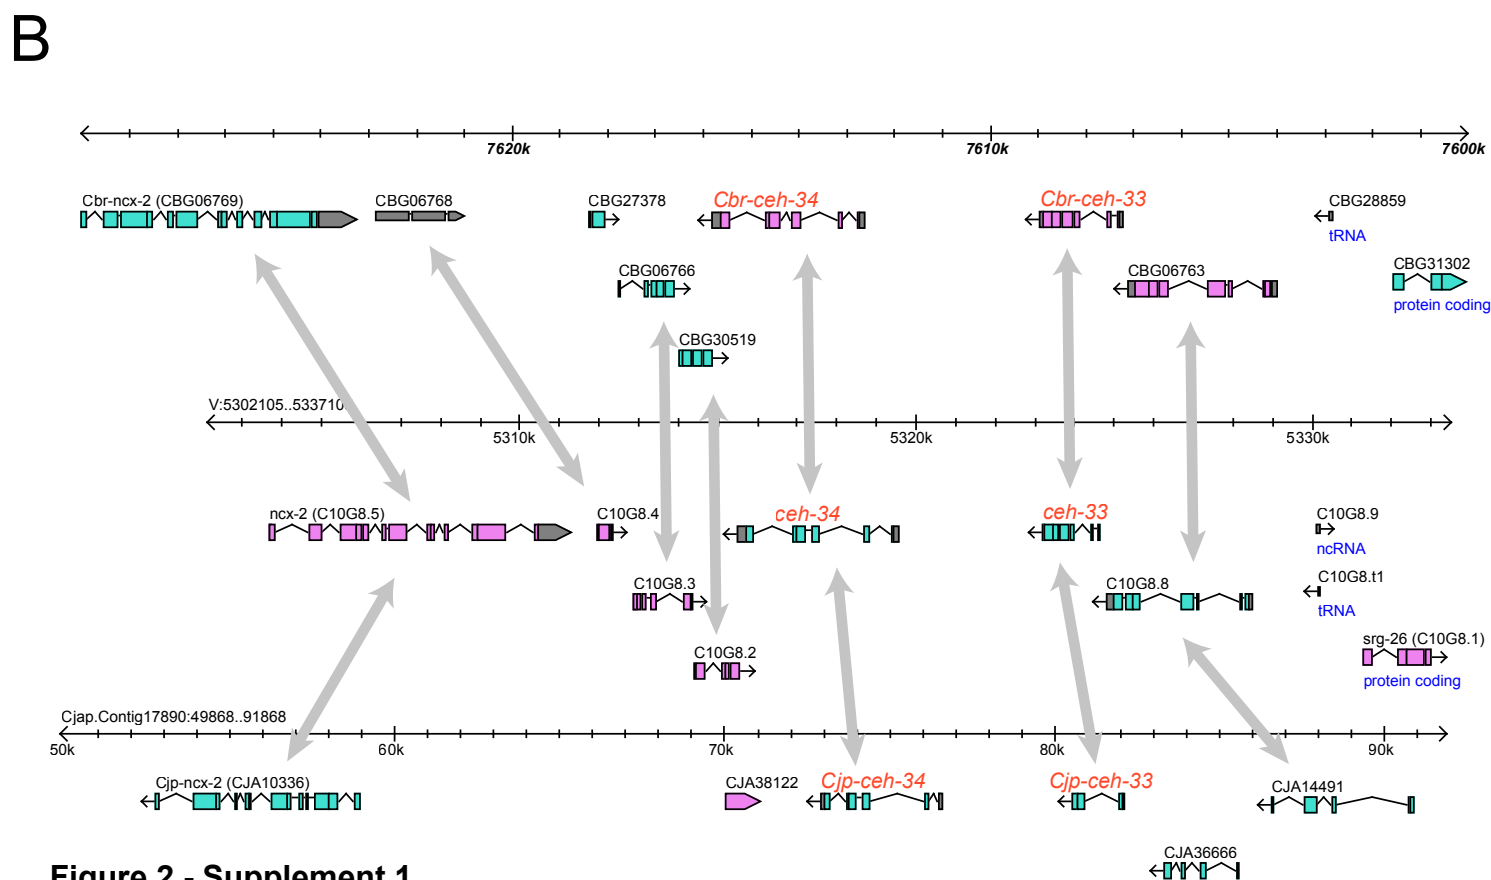

**Figure 2 - Supplement 1**

Supplement: supp [file elife_poa_e76003_Figure_2_figure_supplement_1.pdf › elife_poa_e76003_Figure_2_figure_supplement_1.pdf]

**A**

*pha-4<sup>Prom</sup>*

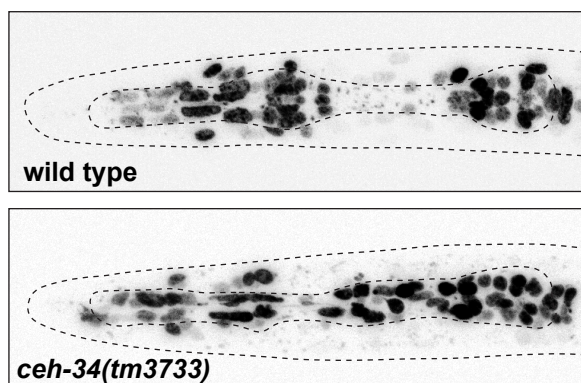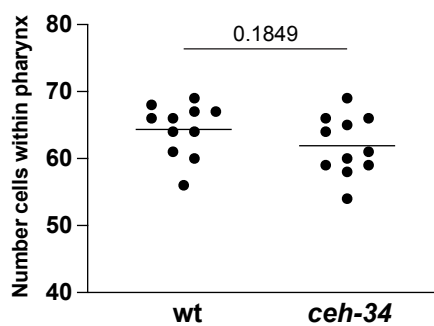

**B**

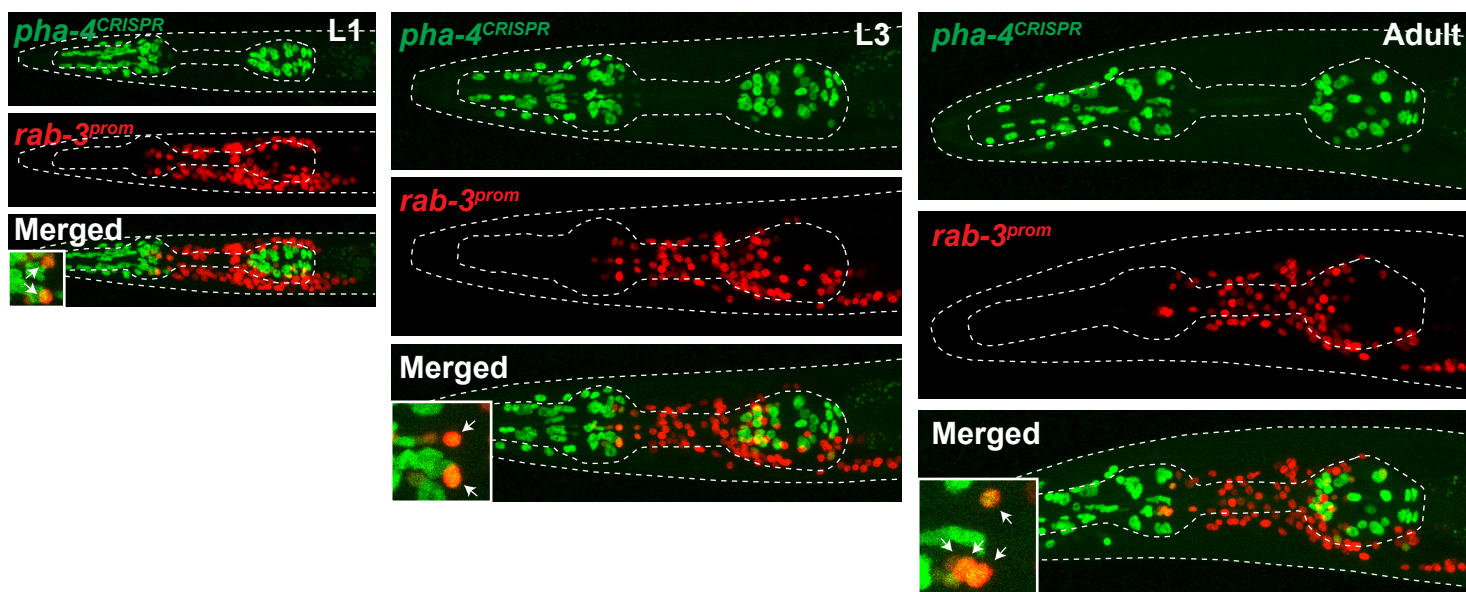

Figure 2 - Supplement 2

Supplement: supp [file elife_poa_e76003_Figure_2_figure_supplement_2.pdf › elife_poa_e76003_Figure_2_figure_supplement_2.pdf]

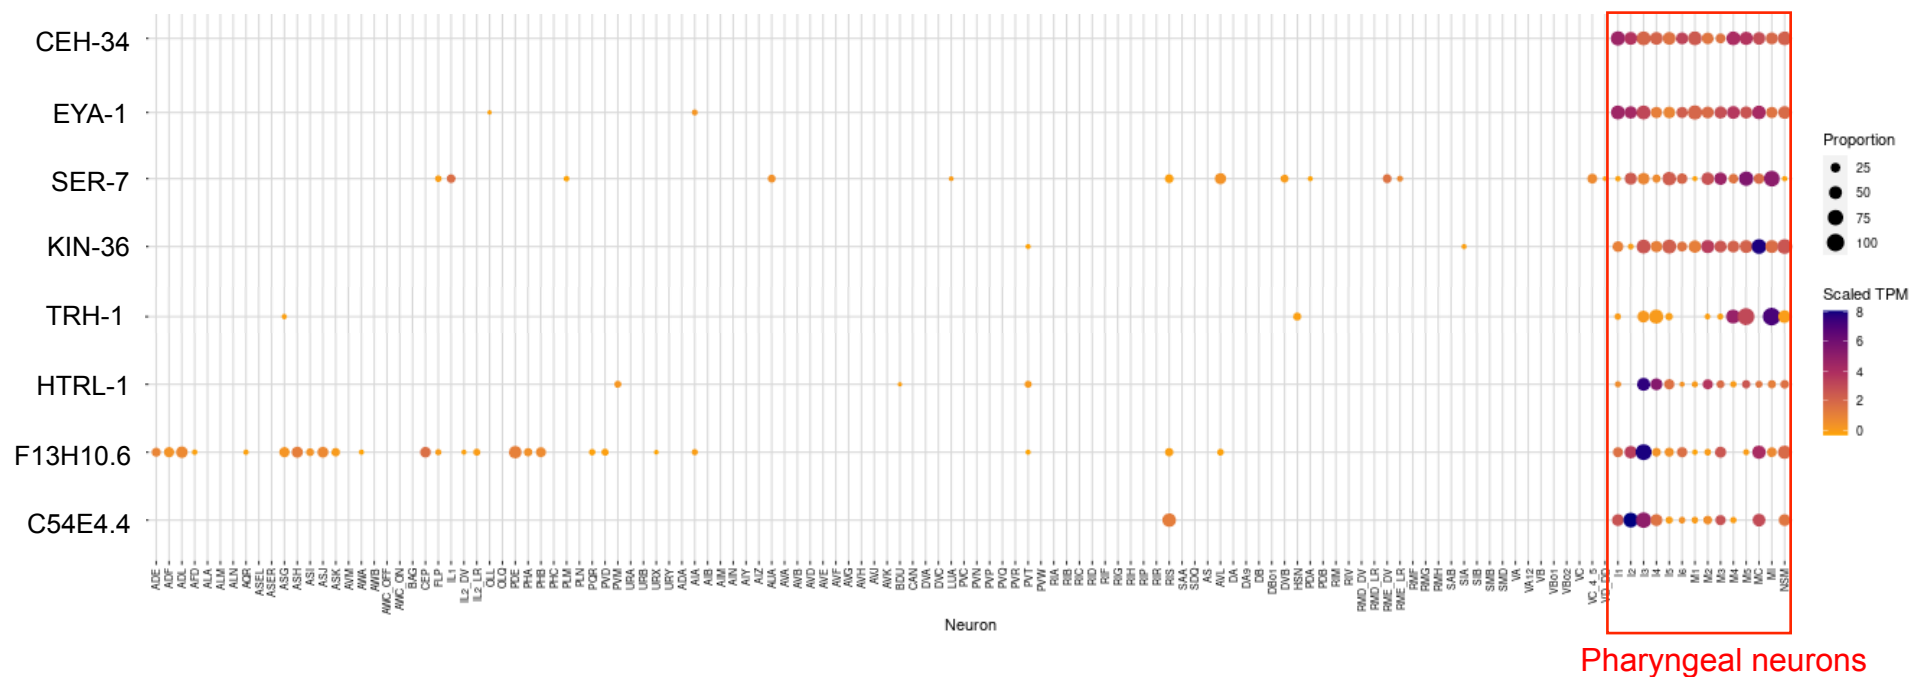

Fig.6 – Supplement 1

Supplement: supp [file elife_poa_e76003_Figure_6_figure_supplement_1.pdf › elife_poa_e76003_Figure_6_figure_supplement_1.pdf]

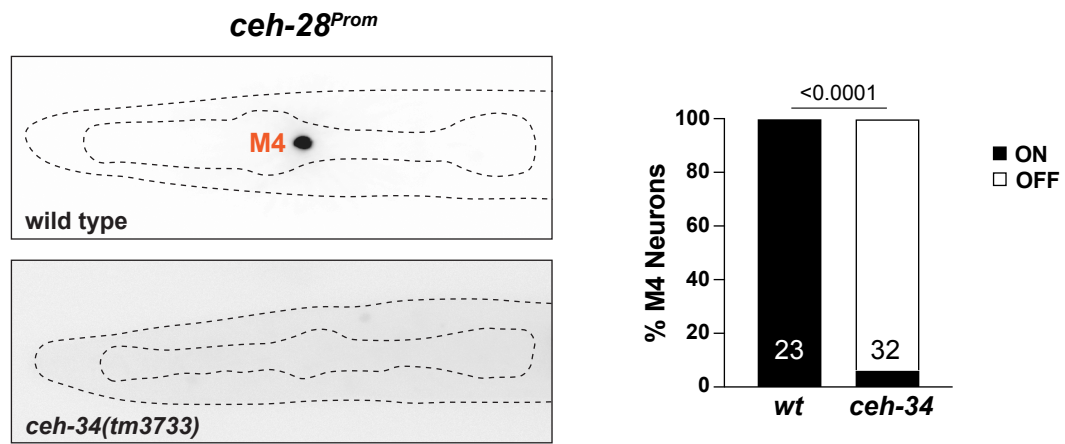

**Fig. 6 - Supplement 2**

Supplement: supp [file elife_poa_e76003_Figure_6_figure_supplement_2.pdf › elife_poa_e76003_Figure_6_figure_supplement_2.pdf]

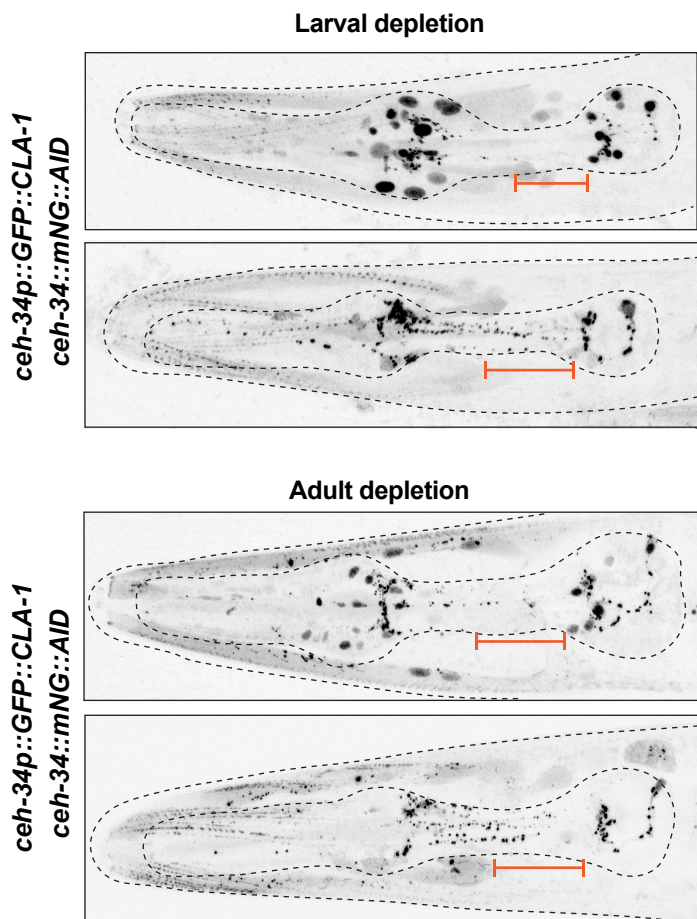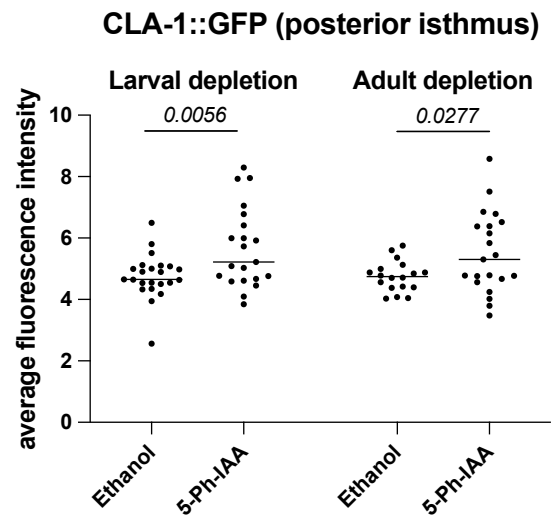

**Figure 8 Supplement 1**

Supplement: supp [file elife_poa_e76003_Figure_8_figure_supplement_1.pdf › elife_poa_e76003_Figure_8_figure_supplement_1.pdf]

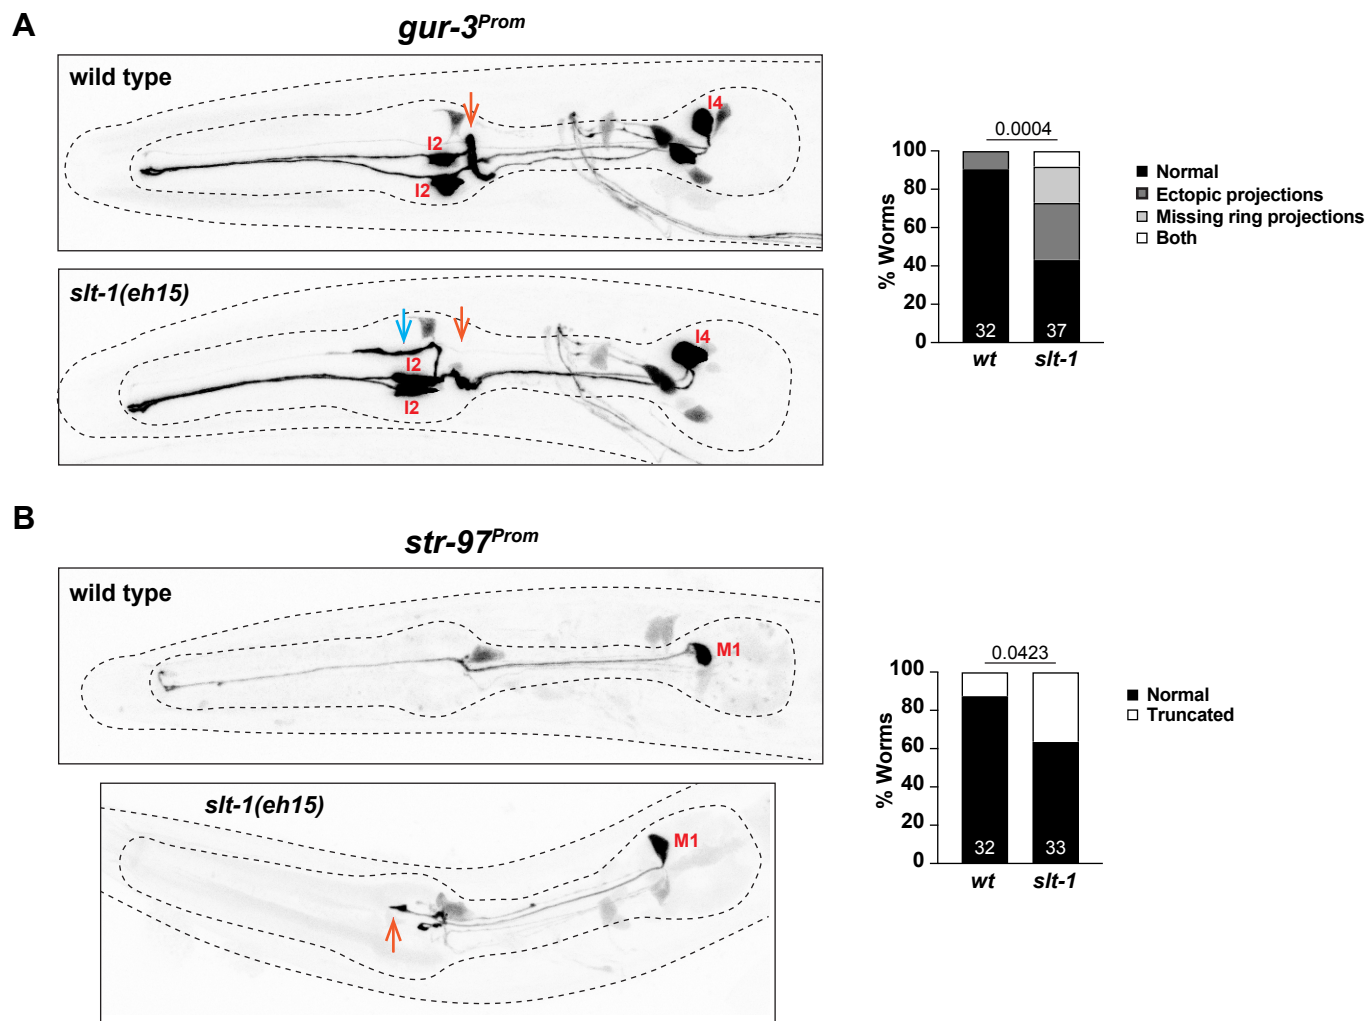

Figure 8 - Supplement 1

Supplement: supp [file elife_poa_e76003_Figure_8_figure_supplement_2.pdf › elife_poa_e76003_Figure_8_figure_supplement_2.pdf]
